# Supplementary material for: Effectiveness and cost-effectiveness of a structured social coaching intervention for people with psychosis (SCENE): protocol for a randomised controlled trial
Source: PubMed Central journal article supplement (PMC8671980; doi:10.1136/bmjopen-2021-050627), 2021-12-13
Supplement: bmjopen-2021-050627.draft_revisions.pdf [file bmjopen-2021-050627.draft_revisions.pdf]

# BMJ Open

BMJ Open is committed to open peer review. As part of this commitment we make the peer review history of every article we publish publicly available.

When an article is published we post the peer reviewers' comments and the authors' responses online. We also post the versions of the paper that were used during peer review. These are the versions that the peer review comments apply to.

The versions of the paper that follow are the versions that were submitted during the peer review process. They are not the versions of record or the final published versions. They should not be cited or distributed as the published version of this manuscript.

BMJ Open is an open access journal and the full, final, typeset and author-corrected version of record of the manuscript is available on our site with no access controls, subscription charges or pay-per-view fees (<http://bmjopen.bmj.com>).

If you have any questions on BMJ Open's open peer review process please email [info.bmjopen@bmj.com](mailto:info.bmjopen@bmj.com)

# BMJ Open

## Effectiveness and cost-effectiveness of a structured social coaching intervention for people with psychosis (SCENE): trial protocol

|                               |                                                                                                                                                                                                                                                                                                                                                                                                                                                                                                                                                                                                                                                                                                                                                                                                                           |
|-------------------------------|---------------------------------------------------------------------------------------------------------------------------------------------------------------------------------------------------------------------------------------------------------------------------------------------------------------------------------------------------------------------------------------------------------------------------------------------------------------------------------------------------------------------------------------------------------------------------------------------------------------------------------------------------------------------------------------------------------------------------------------------------------------------------------------------------------------------------|
| Journal:                      | <i>BMJ Open</i>                                                                                                                                                                                                                                                                                                                                                                                                                                                                                                                                                                                                                                                                                                                                                                                                           |
| Manuscript ID                 | bmjopen-2021-050627                                                                                                                                                                                                                                                                                                                                                                                                                                                                                                                                                                                                                                                                                                                                                                                                       |
| Article Type:                 | Protocol                                                                                                                                                                                                                                                                                                                                                                                                                                                                                                                                                                                                                                                                                                                                                                                                                  |
| Date Submitted by the Author: | 26-Feb-2021                                                                                                                                                                                                                                                                                                                                                                                                                                                                                                                                                                                                                                                                                                                                                                                                               |
| Complete List of Authors:     | <p>Giacco, Domenico; University of Warwick; Newham Centre for Mental Health, Unit for Social and Community Psychiatry</p> <p>Chevalier, Agnes; Newham Centre for Mental Health, Unit for Social and Community Psychiatry</p> <p>Patterson, Megan; Newham Centre for Mental Health, Unit for Social and Community Psychiatry</p> <p>Hamborg, Thomas; Queen Mary University of London</p> <p>Mortimer, Rianna; Queen Mary University of London</p> <p>Feng, Yan; Queen Mary University of London, Blizard Institute</p> <p>Webber, Martin; University of York, Department of Social Policy and Social Work</p> <p>Xanthopoulou, Penny; University of Exeter, Medical School</p> <p>Priebe, Stefan; Barts and the London School of Medicine and Dentistry, University of London, Unit of Social and Community Psychiatry</p> |
| Keywords:                     | Schizophrenia & psychotic disorders < PSYCHIATRY, SOCIAL MEDICINE, MENTAL HEALTH                                                                                                                                                                                                                                                                                                                                                                                                                                                                                                                                                                                                                                                                                                                                          |
|                               |                                                                                                                                                                                                                                                                                                                                                                                                                                                                                                                                                                                                                                                                                                                                                                                                                           |

SCHOLARONE™  
Manuscripts

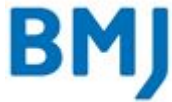

I, the Submitting Author has the right to grant and does grant on behalf of all authors of the Work (as defined in the below author licence), an exclusive licence and/or a non-exclusive licence for contributions from authors who are: i) UK Crown employees; ii) where BMJ has agreed a CC-BY licence shall apply, and/or iii) in accordance with the terms applicable for US Federal Government officers or employees acting as part of their official duties; on a worldwide, perpetual, irrevocable, royalty-free basis to BMJ Publishing Group Ltd ("BMJ") its licensees and where the relevant Journal is co-owned by BMJ to the co-owners of the Journal, to publish the Work in this journal and any other BMJ products and to exploit all rights, as set out in our [licence](#).

The Submitting Author accepts and understands that any supply made under these terms is made by BMJ to the Submitting Author unless you are acting as an employee on behalf of your employer or a postgraduate student of an affiliated institution which is paying any applicable article publishing charge ("APC") for Open Access articles. Where the Submitting Author wishes to make the Work available on an Open Access basis (and intends to pay the relevant APC), the terms of reuse of such Open Access shall be governed by a Creative Commons licence – details of these licences and which [Creative Commons](#) licence will apply to this Work are set out in our licence referred to above.

Other than as permitted in any relevant BMJ Author's Self Archiving Policies, I confirm this Work has not been accepted for publication elsewhere, is not being considered for publication elsewhere and does not duplicate material already published. I confirm all authors consent to publication of this Work and authorise the granting of this licence.

1  
2  
3 **Effectiveness and cost-effectiveness of a structured social coaching intervention for**  
4 **people with psychosis (SCENE): trial protocol**  
5

6  
7 **3912/4000 words**  
8

9 **Authors:**  
10

11 Domenico Giacco,<sup>1,2</sup> Agnes Chevalier,<sup>2</sup> Megan Patterson,<sup>2</sup> Thomas Hamborg,<sup>3</sup> Rianna  
12 Mortimer,<sup>3</sup> Yan Feng,<sup>3</sup> Martin Webber,<sup>4</sup> Penny Xanthopoulou,<sup>5</sup> Stefan Priebe.<sup>2</sup>  
13  
14

15  
16 **Affiliations:**  
17

18  
19 <sup>1</sup> Division of Health Sciences, Warwick Medical School, University of Warwick, Coventry, CV4  
20 7AL

21 <sup>2</sup> Unit for Social and Community Psychiatry, (WHO Collaborating Centre for Mental Health  
22 Service Development), Barts and the London School of Medicine, Queen Mary University of  
23 London, Newham Centre for Mental Health, London, E13 8SP

24 <sup>3</sup> Institute of Population Health Sciences, Barts and the London School of Medicine, Queen  
25 Mary University of London, Yvonne Carter Building, 58 Turner Street, London E1 2AB, UK.

26 <sup>4</sup> International Centre for Mental Health Social Research, Department of Social Policy and  
27 Social Work, University of York, Heslington, York, YO10 5DD, UK.

28 <sup>5</sup> College of Medicine and Health, University of Exeter. St Luke's Campus, Exeter, EX2 4TH,  
29 UK.  
30  
31

32  
33 Correspondence to Dr Domenico Giacco; [domenico.giacco@warwick.ac.uk](mailto:domenico.giacco@warwick.ac.uk)  
34  
35  
36  
37  
38  
39  
40  
41  
42  
43  
44  
45  
46  
47  
48  
49  
50  
51  
52  
53  
54  
55  
56  
57  
58  
59  
60

**ABSTRACT (294 words)****Introduction**

People with psychosis tend to have smaller social networks than both people in the general population and other people with long-term health conditions. Small social networks are associated with poor quality of life. At present no interventions are directly aimed at, or effective in, increasing patients' social networks, and through that improving their quality of life and other health outcomes. Preliminary evidence suggests that coaching patients to increase their social contacts may be effective.

**Methods and analysis**

A structured social coaching intervention was developed based on the literature and refined through stakeholder involvement. It draws on principles from motivational interviewing, solution focused therapy and structured information-giving. It is provided over a six month period and can be delivered by a range of different mental health professionals. Its effectiveness and cost-effectiveness are assessed in a randomised controlled trial, compared to an active control group, in which participants are given an information booklet on local social activities.

Participants are aged 18 or over, have a primary diagnosis of a psychotic disorder (International Classification of Disease: F20-29) and capacity to provide informed consent. Participants are assessed at baseline and at six, 12 and 18 months after individual randomisation. The primary outcome is quality of life at six months (Manchester Short Assessment of Quality of Life). We hypothesise that the effects on quality of life are mediated by an increase in social contacts. Secondary outcomes are symptoms, social situation and time spent in social activities. Costs and cost-effectiveness analyses will consider service use and health-related quality of life.

**Ethics and dissemination**

NHS REC London Hampstead [19/LO/0088] provided a favourable opinion. Findings will be disseminated through a website, social media, scientific papers and user-friendly reports, in collaboration with a lived experience advisory panel.

**Registration**

ISRCTN registry (15815862), <https://doi.org/10.1186/ISRCTN15815862>

## SUMMARY

### Strengths

- This study assesses a novel intervention, directly aimed at reducing social isolation to improve quality of life. No evidence-based interventions are currently available to reduce social isolation among people with severe mental illness.
- There is an active control condition, i.e. the provision of comprehensive information on local social activities.
- The trial has broad inclusion criteria and is carried out across a large number of urban, semi-urban and rural sites. This will allow us to test the intervention taking into account:
  - a) A wide range of individual patient characteristics which may influence the effectiveness of the intervention (financial difficulties, types and levels of symptoms).
  - b) Different geographical contexts which may influence the availability or convenience of social activities (e.g. limited availability of affordable social activities and/or long distances to cover in order to access activities in some areas).

### Limitations

- During this trial we focused on people of working age (18-65) and only included people who are fluent in English. Older people and those who are not fluent in the language of their country of residence encounter additional barriers to socialisation which would have made the population too heterogeneous. Future studies should target these populations specifically.
- Since social coaching was not part of routine care before this trial, the coaches in the experimental intervention are – although trained – not experienced in this type of approach.

## INTRODUCTION

At any given time, more than 200,000 people experience a psychotic disorder in England alone.[1] People with psychotic disorders have much smaller social network sizes compared to the general population, and compared to other groups with long-term mental and physical health problems.[2-3] Social isolation is not only a serious problem in itself, but is also linked with poor quality of life and a range of unfavourable health outcomes.[3-6]

Traditionally, pharmacological and psychological treatments have attempted to reduce the social isolation of patients with psychosis indirectly; through treating symptoms or by teaching social skills.[7] However, the symptoms of psychosis which are mostly linked with social isolation, i.e. the “negative symptoms” do not show a substantial response to established pharmacological treatments.[8] Social skills training has been found to be effective in teaching these skills to patients, however this does not translate to improved social functioning.[9] Given the evidence that its benefits are limited, social skills training is not recommended by NICE guidelines.[4]

A systematic review by Anderson et al.[7] found that interventions which directly focused on supporting socialisation activities had a positive effect on reducing social isolation.[10-13] These interventions were diverse, including guided peer support, social coaching, and dog-assisted integrative psychological therapy. The largest and highest quality trial among the ones identified tested a social coaching intervention.[11] In this study, a mental health professional, supported the patient to identify areas of interest for social activities outside of mental health services and provided coaching sessions as the patient engaged in them.

In a research programme funded by the National Institute for Health Research (NIHR) (<https://scene.elft.nhs.uk>), we developed a manualised and structured social coaching intervention. The effective components identified in the international literature<sup>7</sup> were refined and adapted to the English NHS context. The intervention was designed to improve patients' quality of life through increasing their social networks.

## OBJECTIVES

### *Primary objective*

To assess whether the structured social coaching intervention improves the quality of life of patients with psychosis (primary outcome) compared to an active control group, which received information on local social activities.

### *Secondary objectives*

1. To understand whether changes in quality of life are mediated by an increase in social contacts (in the previous week).

- 2.
  - 3.
  - 4.
  - 5.
  - 6.
  - 7.
  - 8.
  - 9.
  - 10.
  - 11.
  - 12.
  - 13.
  - 14.
  - 15.
  - 16.
  - 17.
  - 18.
  - 19.
  - 20.
  - 21.
  - 22.
  - 23.
  - 24.
  - 25.
  - 26.
  - 27.
  - 28.
  - 29.
  - 30.
  - 31.
  - 32.
  - 33.
  - 34.
  - 35.
  - 36.
  - 37.
  - 38.
  - 39.
  - 40.
  - 41.
  - 42.
  - 43.
  - 44.
  - 45.
  - 46.
  - 47.
  - 48.
  - 49.
  - 50.
  - 51.
  - 52.
  - 53.
  - 54.
  - 55.
  - 56.
  - 57.
  - 58.
  - 59.
  - 60.
2. To evaluate whether the intervention improves secondary outcomes such as social contacts, symptoms, social situation, feelings of loneliness, time spent in social activities, health-related quality of life and whether it reduces service use.
  3. To assess costs and cost-effectiveness of the intervention.
  4. To explore implementation of the intervention.

## METHODS

### **Study design**

Individually randomised, parallel group controlled trial. The intervention and control condition are provided in addition to standard care.

### **Study sites**

This multi-centre study is led by East London NHS Foundation Trust and includes the sites listed in Table 1. The study is currently open to additional sites.

[Insert Table 1 here]

### **Eligibility criteria**

#### Inclusion criteria

##### *Patients:*

- 18-65 years old
- Diagnosis of psychosis-related condition (ICD-10 F20-29)
- Capacity to provide informed consent
- Ability to communicate in English
- Limited social network size (three or less social contacts with non-first degree relatives in the previous week)
- Low quality of life (Score 5 or less on the MANSa quality of life assessment)
- Not receiving hospital treatment at the time of recruitment

##### *Social coaches:*

- Mental health professionals with experience of providing mental health care (e.g. psychiatrists, clinical psychologists, nursing staff, occupational therapists), minimum NHS Band 4 or equivalent experience.
- Aged 18 and over
- Capacity to provide informed consent
- Ability to communicate in English

### **Intervention development**

The intervention developed by Terzian et al.[11] was taken as the starting point for the intervention tested in this trial. It was specified and expanded using approaches from solution-



1  
2  
3 focused therapy and motivational interviewing, and considering previous experiences of the  
4 group in developing and evaluating complex psycho-social interventions, in particular  
5 DIALOG+.[14] It was further modified and then manualised by the Programme Management  
6 group, which included experts in psychiatry, psychology, social work, occupational therapy,  
7 social sciences and behavioural change and experts by experience. The intervention was  
8 finalised in consultation with stakeholders.[15] The intervention is considered to be generic  
9 and not profession-specific, so that it can be delivered by different professional groups. The  
10 role of the social coach is intended to be independent of other treatment and solely focused  
11 on the task of expanding social networks. Social coaches are not meant to establish a wider  
12 or longer-term therapeutic relationship, which might interfere with other therapeutic  
13 relationships of the patients. Intervention procedures and components are reported in Box 1.  
14  
15  
16  
17  
18  
19

### 20 **Randomisation procedures**

21 Patients are individually randomised to either the intervention or control group. The allocation  
22 ratio is 1:1. Randomisation is stratified by site (NHS Trust), ensuring balanced numbers of  
23 patients in each group at each NHS Trust. Permuted blocked randomisation with block sizes  
24 of m=6, 4 and 2 are used within each stratum. Patients are allocated to clinicians based on  
25 locality and availability i.e. not randomly. The randomisation is carried out remotely by the  
26 Pragmatic Clinical Trials Unit at Queen Mary, University of London.  
27  
28  
29

### 30 **Trial arms**

#### 31 Arm 1. Intervention

##### 32 *a. Who delivers the intervention*

33  
34  
35 The intervention is delivered by clinicians from different backgrounds (e.g.  
36 psychologists/assistant psychologists, social workers, nursing staff, occupational therapists  
37 and medical doctors), with a minimum level of experience and seniority equivalent to a NHS  
38 band 4. They take up a role of “social coach” for the treated patient.  
39  
40  
41

##### 42 *b. Type and frequency of sessions*

43  
44  
45 Social coaches meet patients at least three times but ideally monthly over the six-month  
46 intervention period. During the first two sessions of the intervention, a structured eight step  
47 approach is followed and then revisited in follow-up meetings. Please see details of the eight  
48 step approach in Box 1.  
49

50  
51 *[Insert box 1 here]*

52  
53  
54 The intervention starts with two initial face-to-face sessions (which can also occur via video  
55 conferencing), each lasting between 60 and 90 minutes. The main aim of these initial meetings  
56 is to introduce the intervention, explore participants’ social history and discuss preferences  
57 and options for activities. The participant then selects one social activity to focus on during the  
58 remaining meetings and actions are agreed. The subsequent meetings include discussions  
59 around challenges and progress and and take place monthly, lasting about 20 minutes each.  
60

1  
2  
3 The final meeting is face-to-face and is used as both a summary of progress and to plan for  
4 future social activities after the intervention.  
5  
6  
7

### 8 *c. Training and supervision of social coaches*

9

10 Social coaches are trained in one session lasting three hours, normally in a group format  
11 (although one-to-one sessions can be arranged). Training is provided by senior SCENE  
12 researchers.  
13

14 During the training coaches acquire knowledge of the structure and aims of the intervention,  
15 and of simple motivational interviewing (e.g. identifying change talk) and solution focused  
16 therapy techniques (e.g. identifying what has worked in the past). Scenarios in which barriers  
17 for the patients in engaging in new social activities may appear and strategies to overcome  
18 them are discussed.  
19

20 Learning progress is assessed during the training and in the subsequent supervision, provided  
21 by senior members of the research team.

22 Clinicians receive updates on changes in options for activities from the local research team.  
23 They will also receive at least two supervision sessions by SCENE senior researchers.  
24  
25  
26

### 27 Arm 2. Control group

28

29 Patients in the control group are provided with information about local options for social  
30 activities via a booklet sent to them via post or handed over by a researcher. This is intended  
31 to control for the provision of information on social activities and service attention to their social  
32 isolation.  
33  
34  
35  
36

### 37 **Outcomes**

38  
39

#### 40 Primary Outcome

41

42 The primary outcome is subjective quality of life, measured with the Manchester Short  
43 Assessment of Quality of Life (MANSA) at the end of the intervention period (6 months after  
44 randomisation).  
45  
46

47 The MANSA has been widely used in research and cited in more than 850 research papers.  
48 The MANSA is brief with very high completion rates and excellent psychometric properties.[16]  
49  
50

#### 51 Mediator of effect on primary outcome

52

53 Number of social contacts in the previous week, measured at 6 months follow-up using the  
54 Social Contacts Assessment (SCA).[17-18]  
55  
56

#### 57 Secondary outcomes

58

- 59 - Social Contacts (SCA).[17]
- 60

- 1
- 2
- 3 - Psychopathological symptoms assessed with the Positive And Negative Syndrome
- 4 Scale (PANSS).[19]
- 5 - Social situation with the SIX.[20]
- 6
- 7 - Feeling of Loneliness with the UCLA Loneliness Scale.[21]
- 8 - Time spent in social activities with the Time Use Survey.[22]
- 9
- 10 - Service use with the Client Service Receipt Inventory,[23] and from NHS Digital
- 11 datasets.[24]
- 12

13 Study outcomes and timepoints are summarised in Table 2.

14 [Insert Table 2 here]

## 15 **Patient and public involvement**

16  
17  
18  
19 A Lived Experience Advisory Panel (LEAP) has been set-up and meets every six months to  
20 advise on study progress, review materials and support dissemination plans.

21  
22 The LEAP has a central role in the preparation of study materials, design of practical  
23 procedures, and dissemination. For example, LEAP members provided valuable feedback  
24 during the development of the intervention, and for facilitating recruitment and finding out  
25 about available activities in the community. The chair of the LEAP is an expert by experience  
26 who attends regular meetings with the project team and is directly involved in parts of the  
27 research, in particular the interpretation of qualitative data. Findings from all work packages,  
28 including the intervention development are discussed with and influenced by the LEAP.  
29  
30  
31

## 32 **Internal pilot**

33  
34  
35 The trial comprised an internal pilot with the aim of checking the feasibility of recruiting to  
36 target. The recruitment target for the internal pilot was 140 participants representing an  
37 average rate of four participants per site per month for five months. This was achieved within  
38 the 5 month time frame.  
39  
40

## 41 **Trial registration**

42  
43  
44 The trial was registered with the ISRCTN (15815862). Whilst listed retrospectively, the  
45 initial request for registration was made on the 27/02/2019, ahead of the recruitment start  
46 date and thus considered to have been prospectively registered according to ICMJE  
47 guidelines.  
48  
49

## 50 **ANALYSES**

### 51 **Statistical Analysis**

52  
53  
54  
55 The primary outcome analysis will be the comparison of mean MANSAs scores between  
56 treatment groups at 6 months follow-up using a heteroscedastic partially nested mixed-effects  
57 model.[25] This model will account for clustering by treating clinician in the intervention arm,  
58 baseline values of the outcome (MANSAs) and *site* as covariates.  
59  
60

1  
2  
3  
4 Secondary outcomes will be analysed using the same model as for the primary outcome or  
5 an equivalent model appropriate for the outcome type where the secondary outcome is not  
6 continuous. Differences in outcome measures between groups will be compared for 6 month,  
7 12 month and 18 month follow-up data. Additionally, repeated measures models comprising  
8 all four time points will be fitted. Baseline characteristics of patients will be tabulated by  
9 treatment arms.  
10  
11

12  
13 The analysis will be on an intention-to-treat basis, and every effort will be made to collect  
14 complete data. If any outcome data are missing, available subject data only will be analysed  
15 (unbiased analysis under missing-at-random assumption); however, patterns of missing data  
16 will be explored, and a strategy for dealing with missing values will be articulated in the formal  
17 statistical analysis plan.  
18  
19

20 We are planning individual level single imputations (replacing missing values by a fixed value  
21 defined by a certain rule) analyses for partially completed primary outcome data to assess the  
22 uncertainty around the primary outcome analysis estimate. Further details of other sensitivity  
23 analyses planned will be outlined in the statistical analysis plan prior to analysis.  
24  
25

26 A mediator analysis will identify whether the effect on the primary outcome is mediated through  
27 expanded social networks (SCA) at six months, as hypothesised. The product of coefficients  
28 method, with a Sobel test and bootstrap standard errors will be used.[26] Further mediation  
29 analyses will assess the mediation effect of increases in SCA at 6 months on patients' MANSA  
30 score at 12 month follow-up.  
31  
32

33 All analyses are incorporated into a statistical analysis plan, and allocation codes will not be  
34 released to the statistician before the analysis plan is signed off. All researchers involved in  
35 developing the analysis plan will remain blinded until the analysis plan is signed off.  
36  
37

### 38 Sample size calculation

39

40 It is assumed that the proposed new intervention would be implemented and funded across  
41 the NHS only if it achieved at least a medium sized effect. An effect size of 0.35 is equivalent  
42 to an improvement of satisfaction ratings on the MANSA of at least one scale point (on a 7  
43 point scale) for 4 out of a total of 12 life domains. An improvement of quality of life in 4 life  
44 domains is usually regarded as a meaningful difference to patients' life.[16]

45 For detecting such an effect size with 90% power, assuming a conservative ICC of 0.07 for  
46 patients treated by the same professional in the intervention group, 229 patients in the  
47 intervention group and 229 in the control group will be required (total sample = 458). This  
48 sample size has been calculated using an iterative search algorithm. Initially the required  
49 sample size for the pre-specified clinically relevant improvement and power for a range of  
50 different pre-specified allocation ratios is calculated and the sample size in the intervention  
51 arm then inflated to account for the clustering due to participants being treated by the same  
52 clinician. Following this, the minimal sample size resulting in equal group sizes is identified.  
53 This requires 8 additional patients to be recruited compared to the absolute minimum required  
54 (with slightly uneven groups). We will be assuming a drop-out rate (from the study) at 6 months  
55 follow-up of 20% (in line with recent trials of similar interventions with the same patient group)  
56 (VOLUME trial).[18] The sample size calculation is based on 10 patients being treated and  
57  
58  
59  
60

1  
2  
3 followed-up per clinician on average. To account for drop-out, 12 patients need to be allocated  
4 to each clinician and therefore at least 24 social coaches need to be recruited to participate  
5 in the study. Based on recruiting 12 patients per clinician the final total sample size is 576 (288  
6 per arm).  
7  
8  
9

### 10 **Qualitative process evaluation**

11  
12  
13 A qualitative process evaluation will be conducted, employing semi-structured interviews with  
14 a number of purposively selected patients and social coaches. Interviews will be transcribed  
15 and analysed using thematic analysis.[27]  
16

17  
18 We will interview 40 patients in the experimental group to explore experiences of the  
19 intervention and descriptions of qualitative changes in their social network, contacts and  
20 activities. A topic guide for interviews was developed with input from the LEAP. Interviews will  
21 be conducted after the end of the six-month outcome assessment, so that the interviews do  
22 not interfere with the effects of the intervention in influencing the primary outcome (quality of  
23 life at six months). Un-blinded researchers will identify participants, conduct the interviews and  
24 manage qualitative data, so researchers assessing outcomes remain blind to allocation  
25

26 We will use purposive sampling, to include patients who differ according to gender, whether  
27 they live in urban or rural settings and whether or not they completed the intervention.  
28 Sampling of social coaches will include those who have seen more than three patients and  
29 those who have seen fewer.  
30  
31

### 32 **Adherence to manual**

33  
34 Adherence to manual will be assessed through our adherence checklist. Routine  
35 documentation and audiotapes of patient-professional meetings (for consenting participants)  
36 will be compared against the clinician-reported adherence schedule to check reliability. This  
37 is a self-reported checklist of whether and how the different steps of the intervention (Box 1)  
38 are addressed. Clinicians will have addressed all the eight steps of the intervention and  
39 conducted at least three sessions with a given patient for the intervention to be deemed as  
40 completed.  
41  
42  
43  
44  
45

### 46 **Economic evaluation**

47  
48 The within trial analysis will adopt the NHS and Personal Social Services perspective to  
49 assess the cost-effectiveness of the psychosocial intervention for patients with psychosis  
50 compared to best standard practice.[28] The evaluation will focus on the 18 months from  
51 baseline until the end of the follow-up period. The analysis will adhere to guidelines for good  
52 economic evaluation practice as outlined in Ramsey et al.[29] and Sanders et al.[30]  
53  
54

55  
56 Resource-use associated with delivery of the interventions in both trial arms will be identified  
57 using a specially designed intervention implementation form. Participants' use of health  
58 services, including mental health and hospital care, will be extracted from the NHS Digital  
59 database. All participants will be asked to complete a modified version of the Client Services  
60 Receipt Inventory to obtain information about their of other psychosocial interventions,

1  
2  
3 medication and receipt of informal care from families and friends. The quantities of all resource  
4 use will be combined with unit costs to generate cost at the individual participant level. Unit  
5 costs will be obtained from various sources, including a specially designed coach  
6 demographics questionnaire, NHS Reference costs,[31] Unit Costs of Health and Social  
7 Care,[32] NHS drug Tariff,[33] and the UK earnings data.[34]  
8  
9

10 As for outcomes, the primary outcome measure for the economic evaluation will be collected  
11 using the EQ-5D-5L instrument.[35] We will calculate the participant level Quality Adjusted  
12 Life Years (QALYs) and use the EQ-5D-5L data with the area-under-the-curve approach.[36]  
13 The secondary outcome will be measured using the MANSA. The time points for collecting  
14 costs and outcome data are reported in Table 2.  
15  
16

17 Both costs and outcomes occurring during the last 6 months of the follow-up period will be  
18 discounted at 3.5% in line with the NICE recommendation.[28] Costs and outcome data will  
19 be analysed by treatment allocation, and differences between trial arms will be estimated over  
20 18-months, adjusting for baseline differences using regression analysis. We will select an  
21 appropriate method to handle missing data based on the nature of our data.  
22  
23

24 Cost-utility analysis and cost-effectiveness analysis will be applied in the economic evaluation.  
25 In the cost-utility analysis, the estimates of incremental cost-effectiveness ratio (ICER) for the  
26 psychosocial intervention compared to best standard practice will be presented against the  
27 decision maker's willingness to pay a value of £20,000 to £30,000 per QALY.[23] To report  
28 the uncertainty of the point estimate of ICER, we will use the non-parametric bootstrap  
29 approach to estimate the confidence interval around the ICER. We will also present the  
30 probability that the intervention is cost-effective against a range of decision makers'  
31 willingness to pay value using the cost effectiveness acceptability curve. In the cost-  
32 effectiveness analysis, we will calculate the incremental cost per unit change on the MANSA  
33 scale and uncertainty surrounding the ratio.  
34  
35  
36  
37

38 A number of sensitivity analyses to assess the impact of key assumptions as well as  
39 uncertainty with key parameters in the economic evaluation will be conducted to (1) explore  
40 the impact of alternative assumptions about the missing data mechanism; (2) consider  
41 uncertainty in the most important cost drivers to assess the impact of healthcare use; (3) use  
42 a broader analytical perspective by including additional costs for informal care; (4) use 0 to 6  
43 months from randomisation as the time period for economic evaluation.  
44  
45  
46  
47

## 48 **ETHICS AND DISSEMINATION**

49 The study was reviewed and a favourable opinion received from the London Hampstead NHS  
50 Research Ethics Committee [19/LO/0088]. Throughout all phases of the research, we will  
51 disseminate information about the activities of the programme through social media and a project  
52 specific website (<http://scene.elft.nhs.uk/>) in order to reach a wider public audience.  
53  
54  
55

56 When results become available, they will be disseminated through:

- 57 • scientific publications in peer-reviewed open-access journals;
- 58 • presentations at national and international conferences and to professional and non-  
59 professional audiences at appropriate events;  
60



- existing networks, including but not limited to the World Health Organisation, the benchmarking network in mental health, organisations involved in QI programme and the professional networks of the programme management group members.

## IMPACT OF THE COVID PANDEMIC

Following the outbreak of COVID-19 in the United Kingdom, recruitment was stopped from 16/3/2020 to 01/10/2020. We decided to stop the intervention delivery from 16/3/2020 to 21/8/2020 in accordance with social distancing guidelines at that time.

We added an additional follow-up at 10 months from randomisation for those participants who had already been randomised when the study was stopped, but had not completed the treatment period. A sensitivity analysis will consider end-of-treatment as the outcome of comparison, and hence include the assessment of quality of life at 10 months from randomisation rather than at 6 months for these participants.

We created additional adapted versions (used separately from the standard ones) of the Social Contact Assessment and of the Time Use Survey and data collected will be analysed to capture online social contacts and activities throughout the trial.

The recruitment and randomisation of participants was resumed on 01/10/2020. Additional instructions to social coaches were provided on physical distancing with patients and on how to encourage social activities which are either online or can be carried in accordance with different scenarios and different physical distancing directives.

Research follow-up of participants at different timepoints was never stopped and continued over the phone or via video-conferencing.

To adjust for any pandemic effects on the intervention itself, the outcomes or both, a sensitivity analysis will adopt a mixed-effects model approach, grouping participants according to the physical distancing guidance that they have been exposed to. Individual treatment effect estimates of participant groups with different levels of exposure will be calculated.

## DISCUSSION

This study addresses a gap in mental health care provision, i.e. the lack of treatments available to help patients overcome their social isolation<sup>4</sup>. It has broad inclusion criteria and is carried out across a large number of urban, semi-urban and rural sites. This will allow to control by design a number of patient-level (e.g. financial and clinical status) and area-level characteristics (e.g. availability of affordable activities, distance and travel required to access them) which might influence intervention effectiveness. The active control condition, i.e. the provision of comprehensive information on local social activities, does not only control for service attention to social activity and information provision, but also arguably represents a reflection of best current practice.

The methodological choices made when designing the study come with some limitations:

- Older people and those who are not fluent in the language of their country of residence encounter additional barriers to socialisation. Hence, we restricted inclusion criteria to patients with psychotic disorders of working age and to those who are fluent in English,

1  
2  
3 to limit heterogeneity of our sample. Future trials and/or implementation studies should  
4 target these populations specifically.

- 5  
6 - The new intervention has been implemented in services directly as part of the trial.  
7 Social coaches are trained but do not have previous experience in delivering this type  
8 of approach.  
9

10 In addition to this, the COVID-19 outbreak meant that more of the intervention has to be  
11 delivered remotely than originally envisaged, and we do not know whether and how that will  
12 impact on outcomes. We have a sensitivity analysis to estimate this as explained in detail in  
13 the following paragraph.  
14  
15

16 If the intervention is found to be effective in increasing social contacts and improving quality  
17 of life, it can promptly become part of the therapeutic armamentarium of mental health  
18 services. The flexibility of the approach, which can be delivered by different type of  
19 professionals, might facilitate its uptake within the ever evolving landscape of mental health  
20 services. In line with the design of the trial, we do not intend for the social coach to become  
21 be a new professional role in itself. Instead, the function of social coaches can be taken on by  
22 different professionals and exercised along with other clinical activities.  
23  
24  
25  
26

## 27 **AUTHORS' CONTRIBUTIONS**

28 Giacco led the study protocol development and is the Chief Investigator. Priebe led the  
29 intervention development and is the programme co-lead. Mortimer and Hamborg led the  
30 statistical analysis plans. Feng led the health economy analysis section. All authors provided  
31 intellectual input to the paper and approved its final version.  
32  
33  
34  
35

## 36 **FUNDING STATEMENT**

37 This research is funded by the National Institute for Health Research Programme Grants for  
38 Applied Research funding stream (award number: RP-PG-0615-20009). This article reflects  
39 views of the authors and not necessarily those of the NIHR.  
40  
41  
42

## 43 **COMPETING INTERESTS STATEMENT**

44 The authors declare no competing interests.  
45  
46  
47

## 48 **REFERENCES**

- 49  
50 1 McCrone P, Dhanasiri S, Patel A, et al. Paying the Price: The Cost of Mental  
51 Health Care in England to 2026. King's Fund 2008.  
52 [https://www.kingsfund.org.uk/sites/default/files/Paying-the-Price-the-cost-of-  
53 mental-health-care-England-2026-McCrone-Dhanasiri-Patel-Knapp-Lawton-  
54 Smith-Kings-Fund-May-2008\\_0.pdf](https://www.kingsfund.org.uk/sites/default/files/Paying-the-Price-the-cost-of-mental-health-care-England-2026-McCrone-Dhanasiri-Patel-Knapp-Lawton-Smith-Kings-Fund-May-2008_0.pdf) [accessed Feb 2021]  
55  
56 2 Palumbo C, Volpe U, Matanov A, et al. Social: networks of patients with  
57 psychosis: a systematic review. *BMC Res Notes* 2015;8:560.  
58  
59  
60



- 3 Degnan A, Berry K, Sweet D, et al. Social networks and symptomatic and functional outcomes in schizophrenia: a systematic review and meta-analysis. *Soc Psychiatry Psychiatr Epidemiol* 2018; 53(9):873-888.
- 4 National Institute for Health and Care Excellence (NICE). Psychosis and Schizophrenia in Adults: prevention and management 2014; [CG178]. <https://www.nice.org.uk/guidance/cg178/evidence/full-guideline-490503565> [accessed Feb 2021]
- 5 Bengtsson-Tops A, Hansson L. Quantitative and qualitative aspects of the social network in schizophrenic patients living in the community. Relationship to sociodemographic characteristics and clinical factors and subjective quality of life. *International Journal of Social Psychiatry* 2001;47(3):67-77.
- 6 Norman R.M, Malla A.K, Manchanda R, et al. Social support and three-year symptom and admission outcomes for first episode psychosis. *Schizophrenia Research* 2005; 80(2-3):227-34.
- 7 Anderson K, Laxhman N, Priebe S. Can mental health interventions change social networks? A systematic review. *BMC Psychiatry (Open Access)* 2015; 15:297.
- 8 Fusar-Poli P, Papanastasiou E, Stahl D, et al. Treatments of Negative Symptoms in Schizophrenia: Meta-Analysis of 168 Randomized Placebo-Controlled Trials. *Schizophr Bull* 2015; 41(4):892-9.
- 9 Almerie M.Q, Okba Al Marhi M, Jawoosh M, et al. Social skills programmes for schizophrenia. *Cochrane Database of Systematic Reviews* 2015; 2015(6):CD009006
- 10 Castelein S, Bruggeman R, Van Busschbach JT, et al. The effectiveness of peer support groups in psychosis: A randomized controlled trial. *Acta Psychiatr Scand* 2008;118:64–72
- 11 Terzian E, Tognoni G, Bracco R, et al. Social Network Intervention in Patients With Schizophrenia and Marked Social Withdrawal: A Randomized Controlled Study. *Can J Psychiatry* 2013;58:622–631.
- 12 Sheridan AJ, Drennan J, Coughlan B et al., Improving social functioning and reducing social isolation and loneliness among people with enduring mental illness: Report of a randomised controlled trial of supported socialisation. *Int J Soc Psychiatry* 2014;61(3):241-50.
- 13 Hasson-Ohayon I, Mashlach-Eizenberg M, Avidan M, et al. Social Cognition and Interaction Training: Preliminary Results of an RCT in a Community Setting in Israel. *Psychiatr Serv* 2014;65:555–558.
- 14 Giacco D, Priebe S. Using Routine Quality of Life Assessment to Improve Effectiveness of Community Mental Health Care. In: Awad AG, Voruganti LNP, eds. Beyond Assessment of Quality of Life in Schizophrenia. Springer International Publishing Switzerland 2016:145-155.
- 15 Tee H, Priebe S, Santos C, et al. Helping people with psychosis to expand their social networks: the stakeholders' views. *BMC Psychiatry* 2020;20(1):29.
- 16 Priebe S, Kellye L, Omer S, et al. The Effectiveness of a Patient-Centred Assessment with a Solution-Focused Approach (DIALOG+) for Patients with Psychosis: A Pragmatic Cluster-Randomised Controlled Trial in Community Care. *Psychotherapy and Psychosomatics* 2015;84:304-313.

- 17 Giacco D, Palumbo C, Strappelli N, et al. Social contacts and loneliness in people with psychotic and mood disorders. *Compr Psychiatry* 2016;66:59-66.
- 18 Priebe S, Chevalier A, Hamborg T, et al. Effectiveness of a volunteer befriending programme for patients with schizophrenia: randomised controlled trial. *The British Journal of Psychiatry*. Cambridge University Press; 2020;217(3):477–83.
- 19 Kay S. *Positive and Negative Syndromes in Schizophrenia*. New York: Brunner/Mazel 1991.
- 20 Priebe S, Watzke S, Hansson L, et al. Objective social outcomes index (SIX): a method to summarise objective indicators of social outcomes in mental health care. *Acta Psychiatr Scand* 2008;118(1):57-63.
- 21 Hays R.D, DiMatteo M.R. A short-form measure of loneliness. *Journal of personality assessment* 1987;51(1):69-81.
- 22 Priebe S, Pavlickova H, Eldridge S, et al. Effectiveness of one-to-one volunteer support for patients with psychosis: protocol of a randomised controlled trial. *BMJ open* 2016;6(8).
- 23 Beecham J, Knapp M. Costing psychiatric interventions. In: Thornicroft G, eds. *Measuring Mental Health Needs*. Gaskell, 2nd edition 2001:200-224.
- 24 NHS Digital. Secondary Uses Service (SUS). Available from <https://digital.nhs.uk/services/secondary-uses-service-sus> [accessed Feb 2021].
- 25 Candlish J, Teare M.D, Dimairo M, et al. Appropriate statistical methods for analysing partially nested randomised controlled trials with continuous outcomes: a simulation study. *BMC Med Res Methodol* 2018;18:105.
- 26 Fritz CO, Morris PE, Richler JJ. Effect size estimates: current use, calculations, and interpretation. *J Exp Psychol Gen* 2012;141(1):2-18.
- 27 Braun V, Clarke V. Using thematic analysis in psychology. *Qualitative Research in Psychology* 2006;3(2):77–101.
- 28 National Institute for Health and Care Excellence (NICE). *Guide to the methods of technology appraisal* 2013; <https://www.nice.org.uk/process/pmg9/resources/guide-to-the-methods-of-technology-appraisal-2013-pdf-2007975843781> [accessed Aug 2020]
- 29 Ramsey S.D, Willke R.J, Glick H, et al. Cost-effectiveness analysis alongside clinical trials II-an ISPOR good research practices task force report. *Value Health* 2015;18(2):161–172.
- 30 Sanders GD, Neumann PJ, Basu A, et al. Recommendations for conduct, methodological practices, and reporting of cost-effectiveness analyses: second panel on cost-effectiveness in health and medicine. *JAMA* 2016;316(10):1093–1103.
- 31 NHS improvement. National Cost Collection for the NHS. <https://www.england.nhs.uk/national-cost-collection/> [accessed Aug 2020]
- 32 Curtis L, Burns A. *Unit Costs of Health and Social Care* 2019; <https://www.pssru.ac.uk/project-pages/unit-costs/unit-costs-2019/> [accessed Aug 2020]
- 33 NHS Business Service Authority. Drug Tariff online. <https://www.nhsbsa.nhs.uk/pharmacies-gp-practices-and-appliance-contractors/drug-tariff> [accessed Aug 2020]

- 1  
2  
3 34 Office for National Statistics. Earnings and working hours.  
4 <https://www.ons.gov.uk/employmentandlabourmarket/peopleinwork/earningsand>  
5 [workinghours](https://www.ons.gov.uk/employmentandlabourmarket/peopleinwork/earningsand) [accessed Aug 2020]  
6  
7 35 Herdman M, Gudex C, Lloyd A, et al. Development and preliminary testing of the  
8 new five-level version of EQ-5D (EQ-5D-5L) *Qual Life Res* 2011;20:1727–36.  
9  
10 36 Matthews JN, Altman DG, Campbell MJ, et al. Analysis of serial measurements in  
11 medical research. *BMJ* 1990;300:230–235  
12  
13  
14  
15  
16

17 **Table 1. Trial sites**  
18  
19

|                                                                        |
|------------------------------------------------------------------------|
| 20 East London NHS Foundation Trust (two sites: East London and Luton) |
| 21 Tees, Esk and Wear valleys NHS Foundation Trust                     |
| 22 Devon Partnership NHS Trust                                         |
| 23 Cornwall NHS Partnership NHS Trust                                  |
| 24 Oxford Health NHS Foundation Trust                                  |
| 25 Somerset NHS Foundation Trust                                       |
| 26 Leeds and York NHS Foundation Trust                                 |
| 27 Humber Taching NHS Foundation Trust                                 |
| 28 Gloucestershire Health and Care NHS Foundation Trust                |
| 29                                                                     |
| 30                                                                     |
| 31                                                                     |
| 32                                                                     |
| 33                                                                     |
| 34                                                                     |
| 35                                                                     |
| 36                                                                     |
| 37                                                                     |
| 38                                                                     |
| 39                                                                     |
| 40                                                                     |
| 41                                                                     |
| 42                                                                     |
| 43                                                                     |
| 44                                                                     |
| 45                                                                     |
| 46                                                                     |
| 47                                                                     |
| 48                                                                     |
| 49                                                                     |
| 50                                                                     |
| 51                                                                     |
| 52                                                                     |
| 53                                                                     |
| 54                                                                     |
| 55                                                                     |
| 56                                                                     |
| 57                                                                     |
| 58                                                                     |
| 59                                                                     |
| 60                                                                     |

**Table 2. SCENE Study outcomes and timepoints.**

| Assessment                            | Screening | Baseline | Study phase (6 months) | Follow up (12 months) | Follow up (18 months) |
|---------------------------------------|-----------|----------|------------------------|-----------------------|-----------------------|
| <b>All Patient Participants</b>       |           |          |                        |                       |                       |
| MANSA                                 | <b>x</b>  | <b>x</b> | <b>x</b>               | <b>x</b>              | <b>x</b>              |
| Social Contacts Assessment            | <b>x</b>  | <b>x</b> | <b>x</b>               | <b>x</b>              | <b>x</b>              |
| PANSS                                 |           | <b>x</b> | <b>x</b>               | <b>x</b>              | <b>x</b>              |
| Social situation                      |           | <b>x</b> | <b>x</b>               | <b>x</b>              | <b>x</b>              |
| Loneliness                            |           | <b>x</b> | <b>x</b>               | <b>x</b>              | <b>x</b>              |
| Time spent in social activities       |           | <b>x</b> | <b>x</b>               | <b>x</b>              | <b>x</b>              |
| EQ-5D-5L                              |           | <b>x</b> | <b>x</b>               | <b>x</b>              | <b>x</b>              |
| Client Service Receipt Inventory      |           | <b>x</b> | <b>x</b>               | <b>x</b>              | <b>x</b>              |
| Healthcare source use (NHS Digital)   |           | <b>x</b> | <b>x</b>               | <b>x</b>              | <b>x</b>              |
| <b>Intervention Participants only</b> |           |          |                        |                       |                       |
| Semi-structured interviews            |           |          | <b>x</b>               |                       |                       |
| <b>Social coaches</b>                 |           |          |                        |                       |                       |
| Adherence schedule                    |           |          | <b>x</b>               |                       |                       |
| Semi-Structured Interviews            |           |          | <b>x</b>               |                       |                       |

**Box 1. SCENE Social coaching intervention: the eight step approach**

**1) Introduction:** The social coach and the patient introduce themselves.

**2) Clarification of the remit of the intervention:** The professional explains and discusses the focused remit of the intervention, i.e. that it aims to expand social networks and that all other therapeutic issues have to be addressed elsewhere.

**3) Exploration of past and current activities:** The social coach explores past activities that involved social contacts; this should be done chronologically covering the adult life time of the patient from the age of 15 years onwards, and stepwise for periods of 5 – 10 years. At the end of the exploration, professional and patient go through the list of activities (if any) and discuss to what extent the patient enjoyed each activity. Solution focused therapy techniques (e.g. identifying what went well and what worked) can be used.

**4) Motivation for change:** The professional explores and discusses the patient's motivation to change and expand their social networks. Motivational interviewing techniques (e.g. identifying change talk) can be used.

**5) Options for activities:** Professional and patient discuss which new activities (or expanding existing ones respectively) the patient considers.

**6) Information:** The professional provides as much helpful information as possible about options in the given locality for patients' preferred activities. Professional and patient discuss the practicalities and sometimes decide to obtain further information. In this step, the patient is encouraged and supported to find information him/herself. Yet, if this is a substantial hurdle, the professional provides as much direct support as needed.

**7) Consideration and decision:** Once options have been identified, the patient is asked to consider taking it up. If the patient is ambivalent, patients are encouraged to take time, e.g. a week until the next meeting or a phone call, to think about it.

**8) Definition of activity:** Finally, the patient decides on the type of activity and some specification of the actual steps (e.g. twice per week attending a certain class, but not necessarily on which days), so that professional and patient can assess afterwards whether the activity has been completed or not. The task gets documented for the patient, e.g. written on a piece of paper that the patient takes along.

**How are the steps covered during the sessions?**

How much time each step takes and to what extent they are covered in one or two sessions varies.

Usually, the first meeting would end with steps 5 or 6, and after the second meeting an activity is agreed upon. However, it is allowed that patients and professional leave the decision to a third session or take it during the first session if this is possible.

During follow-up sessions, social coach and patient discuss to what extent the activity has been done. The social coach provides positive feedback and – if required – deals with complete or partial perceived failure using solution focused techniques (e.g. emphasising what went well). In case professional and patient come to the conclusion that the originally planned activity does not work, a face-to-face meeting is arranged in which steps 4 to 8 of the initial meetings are repeated and a different activity is planned. In most cases, this is done before the first activity has been tried for a three months.

# BMJ Open

## Effectiveness and cost-effectiveness of a structured social coaching intervention for people with psychosis (SCENE): trial protocol

|                                 |                                                                                                                                                                                                                                                                                                                                                                                                                                                                                                                                                                                                                                                                                                                                                                                                                                                                                           |
|---------------------------------|-------------------------------------------------------------------------------------------------------------------------------------------------------------------------------------------------------------------------------------------------------------------------------------------------------------------------------------------------------------------------------------------------------------------------------------------------------------------------------------------------------------------------------------------------------------------------------------------------------------------------------------------------------------------------------------------------------------------------------------------------------------------------------------------------------------------------------------------------------------------------------------------|
| Journal:                        | <i>BMJ Open</i>                                                                                                                                                                                                                                                                                                                                                                                                                                                                                                                                                                                                                                                                                                                                                                                                                                                                           |
| Manuscript ID                   | bmjopen-2021-050627.R1                                                                                                                                                                                                                                                                                                                                                                                                                                                                                                                                                                                                                                                                                                                                                                                                                                                                    |
| Article Type:                   | Protocol                                                                                                                                                                                                                                                                                                                                                                                                                                                                                                                                                                                                                                                                                                                                                                                                                                                                                  |
| Date Submitted by the Author:   | 29-Sep-2021                                                                                                                                                                                                                                                                                                                                                                                                                                                                                                                                                                                                                                                                                                                                                                                                                                                                               |
| Complete List of Authors:       | <p>Giacco, Domenico; University of Warwick; Newham Centre for Mental Health, Unit for Social and Community Psychiatry<br/>           Chevalier, Agnes; Newham Centre for Mental Health, Unit for Social and Community Psychiatry<br/>           Patterson, Megan; Newham Centre for Mental Health, Unit for Social and Community Psychiatry<br/>           Hamborg, Thomas; Queen Mary University of London<br/>           Mortimer, Rianna; Queen Mary University of London<br/>           Feng, Yan; Queen Mary University of London, Blizard Institute<br/>           Webber, Martin; University of York, Department of Social Policy and Social Work<br/>           Xanthopoulou, Penny; University of Exeter, Medical School<br/>           Priebe, Stefan; Barts and the London School of Medicine and Dentistry, University of London, Unit of Social and Community Psychiatry</p> |
| <b>Primary Subject Heading</b>: | Mental health                                                                                                                                                                                                                                                                                                                                                                                                                                                                                                                                                                                                                                                                                                                                                                                                                                                                             |
| Secondary Subject Heading:      | Evidence based practice, Health economics, Health services research, Rehabilitation medicine                                                                                                                                                                                                                                                                                                                                                                                                                                                                                                                                                                                                                                                                                                                                                                                              |
| Keywords:                       | Schizophrenia & psychotic disorders < PSYCHIATRY, SOCIAL MEDICINE, MENTAL HEALTH                                                                                                                                                                                                                                                                                                                                                                                                                                                                                                                                                                                                                                                                                                                                                                                                          |
|                                 |                                                                                                                                                                                                                                                                                                                                                                                                                                                                                                                                                                                                                                                                                                                                                                                                                                                                                           |

SCHOLARONE™  
Manuscripts



I, the Submitting Author has the right to grant and does grant on behalf of all authors of the Work (as defined in the below author licence), an exclusive licence and/or a non-exclusive licence for contributions from authors who are: i) UK Crown employees; ii) where BMJ has agreed a CC-BY licence shall apply, and/or iii) in accordance with the terms applicable for US Federal Government officers or employees acting as part of their official duties; on a worldwide, perpetual, irrevocable, royalty-free basis to BMJ Publishing Group Ltd ("BMJ") its licensees and where the relevant Journal is co-owned by BMJ to the co-owners of the Journal, to publish the Work in this journal and any other BMJ products and to exploit all rights, as set out in our [licence](#).

The Submitting Author accepts and understands that any supply made under these terms is made by BMJ to the Submitting Author unless you are acting as an employee on behalf of your employer or a postgraduate student of an affiliated institution which is paying any applicable article publishing charge ("APC") for Open Access articles. Where the Submitting Author wishes to make the Work available on an Open Access basis (and intends to pay the relevant APC), the terms of reuse of such Open Access shall be governed by a Creative Commons licence – details of these licences and which [Creative Commons](#) licence will apply to this Work are set out in our licence referred to above.

Other than as permitted in any relevant BMJ Author's Self Archiving Policies, I confirm this Work has not been accepted for publication elsewhere, is not being considered for publication elsewhere and does not duplicate material already published. I confirm all authors consent to publication of this Work and authorise the granting of this licence.

1  
2  
3 **Effectiveness and cost-effectiveness of a structured social coaching intervention for**  
4 **people with psychosis (SCENE): trial protocol**  
5

6  
7 **4236 words**  
8

9 **Authors:**  
10

11 Domenico Giacco,<sup>1,2</sup> Agnes Chevalier,<sup>2</sup> Megan Patterson,<sup>2</sup> Thomas Hamborg,<sup>3</sup> Rianna  
12 Mortimer,<sup>3</sup> Yan Feng,<sup>3</sup> Martin Webber,<sup>4</sup> Penny Xanthopoulou,<sup>5</sup> Stefan Priebe.<sup>2</sup>  
13  
14

15  
16 **Affiliations:**  
17

18  
19 <sup>1</sup> Division of Health Sciences, Warwick Medical School, University of Warwick, Coventry, CV4  
20 7AL

21 <sup>2</sup> Unit for Social and Community Psychiatry, (WHO Collaborating Centre for Mental Health  
22 Service Development), Barts and the London School of Medicine, Queen Mary University of  
23 London, Newham Centre for Mental Health, London, E13 8SP

24 <sup>3</sup> Institute of Population Health Sciences, Barts and the London School of Medicine, Queen  
25 Mary University of London, Yvonne Carter Building, 58 Turner Street, London E1 2AB, UK.

26 <sup>4</sup> International Centre for Mental Health Social Research, Department of Social Policy and  
27 Social Work, University of York, Heslington, York, YO10 5DD, UK.

28 <sup>5</sup> College of Medicine and Health, University of Exeter. St Luke's Campus, Exeter, EX2 4TH,  
29 UK.  
30  
31

32  
33 Correspondence to Dr Domenico Giacco; [domenico.giacco@warwick.ac.uk](mailto:domenico.giacco@warwick.ac.uk)  
34  
35  
36  
37  
38  
39  
40  
41  
42  
43  
44  
45  
46  
47  
48  
49  
50  
51  
52  
53  
54  
55  
56  
57  
58  
59  
60



**ABSTRACT (299 words)****Introduction**

People with psychosis tend to have smaller social networks than both people in the general population and other people with long-term health conditions. Small social networks are associated with poor quality of life. Preliminary evidence suggests that coaching patients to increase their social contacts may be effective. In this study we assessed whether structured social coaching improves the quality of life of patients with psychosis (primary outcome) compared to an active control group, receiving information on local social activities.

**Methods and analysis**

A structured social coaching intervention was developed based on the literature and refined through stakeholder involvement. It draws on principles from motivational interviewing, solution focused therapy and structured information-giving. It is provided over a six month period and can be delivered by a range of different mental health professionals. Its effectiveness and cost-effectiveness are assessed in a randomised controlled trial, compared to an active control group, in which participants are given an information booklet on local social activities.

Participants are aged 18 or over, have a primary diagnosis of a psychotic disorder (International Classification of Disease: F20-29) and capacity to provide informed consent. Participants are assessed at baseline and at six, 12 and 18 months after individual randomisation. The primary outcome is quality of life at six months (Manchester Short Assessment of Quality of Life). We hypothesise that the effects on quality of life are mediated by an increase in social contacts. Secondary outcomes are symptoms, social situation and time spent in social activities. Costs and cost-effectiveness analyses will consider service use and health-related quality of life.

**Ethics and dissemination**

NHS REC London Hampstead [19/LO/0088] provided a favourable opinion. Findings will be disseminated through a website, social media, scientific papers and user-friendly reports, in collaboration with a lived experience advisory panel.

**Registration**

ISRCTN registry (15815862), <https://doi.org/10.1186/ISRCTN15815862>

## SUMMARY

### Strengths

- Broad inclusion criteria, allowing inclusion of patients with a range of individual characteristics (e.g. varying level of financial difficulties, and different types and levels of symptoms).
- Inclusion of a large number of urban, semi-urban and rural sites, as different geographical contexts may influence the availability or convenience of social activities
- Active control condition, i.e. the provision of comprehensive information on local social activities.

### Limitations

- During this trial we focused on people of working age (18-65) and only included people who are fluent in English.
- Since social coaching was not part of routine care before this trial, the coaches in the experimental intervention are – although trained – not experienced in this type of approach.

## INTRODUCTION

At any given time, more than 200,000 people experience a psychotic disorder in England alone. The total costs for England was estimated to be £4 billion in 2007 and £6.5 billion by 2026.[1] People with psychotic disorders have much smaller social network sizes compared to the general population, and compared to other groups with long-term mental and physical health problems.[2-3] Social isolation is not only a serious problem in itself, but is also linked with poor quality of life and a range of unfavourable health outcomes.[3-6]

Traditionally, pharmacological and psychological treatments have attempted to reduce the social isolation of patients with psychosis indirectly; through treating symptoms or by teaching social skills.[7] However, the symptoms of psychosis which are mostly linked with social isolation, i.e. the “negative symptoms” do not show a substantial response to established pharmacological treatments.[8] Social skills training has been found to be effective in teaching these skills to patients, however this does not translate to improved social functioning.[9] Given the evidence that its benefits are limited, social skills training is not recommended by NICE guidelines.[4]

A systematic review by Anderson et al.[7] found that interventions which directly focused on supporting socialisation activities had a positive effect on reducing social isolation.[10-13] These interventions were diverse, including guided peer support, social coaching, and dog-assisted integrative psychological therapy. The largest and highest quality trial among the ones identified tested a social coaching intervention, which was the only intervention clearly targeting social contacts outside of services [11]. This led to the decision that this model would inform our intervention development. One of the limitations identified by the systematic review was that none of the studies reported an economic analysis of the costs and benefits of the interventions [7].

In a research programme funded by the National Institute for Health Research (NIHR) (<https://scene.elft.nhs.uk>), we developed a manualised and structured social coaching intervention. The effective components identified in the international literature<sup>7</sup> were refined and adapted to the English NHS context. The intervention was designed to improve patients' quality of life through increasing their social networks.

## OBJECTIVES

### *Primary objective*

To assess whether the structured social coaching intervention improves the quality of life of patients with psychosis (primary outcome) compared to an active control group, which received information on local social activities.

### *Secondary objectives*

1. To understand whether changes in quality of life are mediated by an increase in social contacts (in the previous week).

- 2.
  - 3.
  - 4.
  - 5.
  - 6.
  - 7.
  - 8.
  - 9.
  - 10.
  - 11.
  - 12.
  - 13.
  - 14.
  - 15.
  - 16.
  - 17.
  - 18.
  - 19.
  - 20.
  - 21.
  - 22.
  - 23.
  - 24.
  - 25.
  - 26.
  - 27.
  - 28.
  - 29.
  - 30.
  - 31.
  - 32.
  - 33.
  - 34.
  - 35.
  - 36.
  - 37.
  - 38.
  - 39.
  - 40.
  - 41.
  - 42.
  - 43.
  - 44.
  - 45.
  - 46.
  - 47.
  - 48.
  - 49.
  - 50.
  - 51.
  - 52.
  - 53.
  - 54.
  - 55.
  - 56.
  - 57.
  - 58.
  - 59.
  - 60.
2. To evaluate whether the intervention improves secondary outcomes such as social contacts, symptoms, social situation, feelings of loneliness, time spent in social activities, health-related quality of life and whether it reduces service use.
  3. To assess costs and cost-effectiveness of the intervention.
  4. To explore implementation of the intervention.

## METHODS

### **Study design**

Individually randomised, parallel group controlled trial. The intervention and control condition are provided in addition to standard care.

### **Study sites**

This multi-centre study is led and sponsored by East London NHS Foundation Trust (<https://www.elft.nhs.uk/Contact-Us>) and includes the sites listed in Table 1. The study is currently open to additional sites.

[Insert Table 1 here]

### **Eligibility criteria**

#### Inclusion criteria

##### *Patients:*

- 18-65 years old
- Diagnosis of psychosis-related condition (ICD-10 F20-29)
- Capacity to provide informed consent
- Ability to communicate in English
- Limited social network size (three or less social contacts with non-first degree relatives in the previous week)
- Low quality of life (Score 5 or less on the MANSA quality of life assessment)
- Not receiving hospital treatment at the time of recruitment

##### *Social coaches:*

- Mental health professionals with experience of providing mental health care (e.g. psychiatrists, clinical psychologists, nursing staff, occupational therapists), minimum NHS Band 4 or equivalent experience.
- Aged 18 and over
- Capacity to provide informed consent
- Ability to communicate in English

### **Intervention development**

1  
2  
3 The intervention developed by Terzian et al.[11] was taken as the starting point for the  
4 intervention tested in this trial. It was specified and expanded using approaches from solution-  
5 focused therapy and motivational interviewing, and considering previous experiences of the  
6 group in developing and evaluating complex psycho-social interventions, in particular  
7 DIALOG+ [14]. It was further modified and then manualised by the Programme Management  
8 group, which included experts in psychiatry, psychology, social work, occupational therapy,  
9 social sciences and behavioural change and experts by experience. The intervention was  
10 finalised in consultation with stakeholders.[15] The intervention is considered to be generic  
11 and not profession-specific, so that it can be delivered by different professional groups. The  
12 role of the social coach is intended to be independent of other treatment and solely focused  
13 on the task of expanding social networks. Social coaches are not meant to establish a wider  
14 or longer-term therapeutic relationship, which might interfere with other therapeutic  
15 relationships of the patients. The theoretical framework used is shown in Figure 1.  
16  
17  
18  
19

20 [Insert Figure 1 here]  
21  
22

### 23 **Randomisation procedures**

24 Patients are individually randomised to either the intervention or control group. The allocation  
25 ratio is 1:1. Randomisation is stratified by site (NHS Trust), ensuring balanced numbers of  
26 patients in each group at each NHS Trust. Permuted blocked randomisation with block sizes  
27 of m=6, 4 and 2 are used within each stratum. Patients are allocated to clinicians based on  
28 locality and availability i.e. not randomly. The randomisation is carried out remotely by the  
29 Pragmatic Clinical Trials Unit at Queen Mary, University of London, which is also responsible  
30 for database development and assists the team with data monitoring.  
31  
32

### 33 **Trial arms**

#### 34 Arm 1. Intervention

##### 35 *a. Who delivers the intervention*

36 The intervention is delivered by clinicians from different backgrounds (e.g.  
37 psychologists/assistant psychologists, social workers, nursing staff, occupational therapists  
38 and medical doctors), with a minimum level of experience and seniority equivalent to a NHS  
39 band 4. They take up a role of “social coach” for the treated patient.  
40  
41  
42  
43  
44  
45

##### 46 *b. Type and frequency of sessions*

47 Social coaches meet patients at least three times but ideally monthly over the six-month  
48 intervention period. During the first two sessions of the intervention, a structured eight step  
49 approach is followed and then revisited in follow-up meetings. Please see details of the eight  
50 step approach and of the intervention sessions in Box 1.  
51  
52  
53

54 [Insert box 1 here]  
55  
56

57 The intervention starts with two initial face-to-face sessions (which can also occur via video  
58 conferencing), each lasting between 60 and 90 minutes. The main aim of these initial meetings  
59 is to introduce the intervention, explore participants’ social history and discuss preferences  
60

1  
2  
3 and options for activities. The participant then selects one social activity to focus on during the  
4 remaining meetings and actions are agreed. The subsequent meetings include discussions  
5 around challenges and progress and and take place monthly, lasting about 20 minutes each.  
6 The final meeting is face-to-face and is used as both a summary of progress and to plan for  
7 future social activities after the intervention. The intervention can be stopped at any time on  
8 participant request.  
9

### 10 11 12 13 *c. Training and supervision of social coaches*

14  
15 Social coaches are trained in one session lasting three hours, normally in a group format  
16 (although one-to-one sessions can be arranged). Training is provided by senior SCENE  
17 researchers.

18 During the training coaches acquire knowledge of the structure and aims of the intervention,  
19 and of simple motivational interviewing (e.g. identifying change talk) and solution focused  
20 therapy techniques (e.g. identifying what has worked in the past). Scenarios in which barriers  
21 for the patients in engaging in new social activities may appear and strategies to overcome  
22 them are discussed.  
23

24 Learning progress is assessed during the training and in the subsequent supervision, provided  
25 by senior members of the research team.

26 Clinicians receive updates on changes in options for activities from the local research team.  
27 They will also receive at least two supervision sessions by SCENE senior researchers.  
28  
29

### 30 31 32 Arm 2. Control group

33  
34 Patients in the control group are provided with information about local options for social  
35 activities via a booklet sent to them via post or handed over by a researcher. This is intended  
36 to control for the provision of information on social activities and service attention to their social  
37 isolation.  
38  
39

### 40 41 **Outcomes**

#### 42 43 44 Primary Outcome

45  
46 The primary outcome is subjective quality of life, measured with the Manchester Short  
47 Assessment of Quality of Life (MANSA) at the end of the intervention period (6 months after  
48 randomisation).  
49

50  
51 The MANSA has been widely used in research and cited in more than 850 research papers.  
52 The MANSA is brief with very high completion rates and excellent psychometric properties.[16]  
53  
54

#### 55 56 Mediator of effect on primary outcome

57  
58 Number of social contacts in the previous week, measured at 6 months follow-up using the  
59 Social Contacts Assessment (SCA)[17-18].  
60

## Secondary outcomes

- Social Contacts (SCA).[17]
- Psychopathological symptoms assessed with the Positive And Negative Syndrome Scale (PANSS).[19]
- Social situation with the SIX.[20]
- Feeling of loneliness with the UCLA Loneliness Scale.[21]
- Time spent in social activities with the Time Use Survey.[22]
- Health-related quality of life with the EQ-5D-5L.[23]
- Service use with the Client Service Receipt Inventory,[24] and from NHS Digital datasets.[25]

Study outcomes and timepoints are summarised in Table 2.

[Insert Table 2 here]

## **Patient and public involvement**

A Lived Experience Advisory Panel (LEAP) has been set-up and meets every six months to advise on study progress, review materials and support dissemination plans.

The LEAP has a central role in the preparation of study materials, design of practical procedures, and dissemination. For example, LEAP members provided valuable feedback during the development of the intervention, and for facilitating recruitment and finding out about available activities in the community. The chair of the LEAP is an expert by experience who attends regular meetings with the project team and is directly involved in parts of the research, in particular the interpretation of qualitative data. Findings from all work packages, including the intervention development are discussed with and influenced by the LEAP.

## **Internal pilot**

The trial comprised an internal pilot with the aim of checking the feasibility of recruiting to target. The recruitment target for the internal pilot was 140 participants representing an average rate of four participants per site per month for five months. This was achieved within the 5 month time frame.

## **Trial registration**

The trial was registered with the ISRCTN (15815862). Whilst listed retrospectively, the initial request for registration was made on the 27/02/2019, ahead of the recruitment start date and thus considered to have been prospectively registered according to ICMJE guidelines.

## **Independent Committees**



1  
2  
3 The trial has an independent Project Steering Committee and a Data Monitoring Committee.  
4 Both include among their members one clinician/clinical researcher, one quantitative  
5 methodologist and one person with lived experience of mental illness.  
6  
7

## 8 9 **ANALYSES**

### 10 11 **Statistical Analysis**

12  
13  
14 The primary outcome analysis will be the comparison of mean MANSA scores between  
15 treatment groups at 6 months follow-up using a heteroscedastic partially nested mixed-effects  
16 model.[26] This model will account for clustering by treating clinician in the intervention arm,  
17 baseline values of the outcome (MANSA) and *site* as covariates.  
18

19  
20 Secondary outcomes will be analysed using the same model as for the primary outcome or  
21 an equivalent model appropriate for the outcome type where the secondary outcome is not  
22 continuous. Differences in outcome measures between groups will be compared for 6 month,  
23 12 month and 18 month follow-up data. Additionally, repeated measures models comprising  
24 all four time points will be fitted. Baseline characteristics of patients will be tabulated by  
25 treatment arms.  
26

27  
28 The analysis will be on an intention-to-treat basis, and every effort will be made to collect  
29 complete data. If any outcome data are missing, available subject data only will be analysed  
30 (unbiased analysis under missing-at-random assumption); however, patterns of missing data  
31 will be explored, and a strategy for dealing with missing values will be articulated in the formal  
32 statistical analysis plan.  
33

34  
35 We are planning individual level single imputations (replacing missing values by a fixed value  
36 defined by a certain rule) analyses for partially completed primary outcome data to assess the  
37 uncertainty around the primary outcome analysis estimate. Further details of other sensitivity  
38 analyses planned will be outlined in the statistical analysis plan prior to analysis.  
39

40  
41 A mediator analysis will identify whether the effect on the primary outcome is mediated through  
42 expanded social networks (SCA) at six months, as hypothesised. The product of coefficients  
43 method, with a Sobel test and bootstrap standard errors will be used.[27] Further mediation  
44 analyses will assess the mediation effect of increases in SCA at 6 months on patients' MANSA  
45 score at 12 month follow-up.  
46  
47

48  
49 All analyses are incorporated into a statistical analysis plan, and allocation codes will not be  
50 released to the statistician before the analysis plan is signed off. All researchers involved in  
51 developing the analysis plan will remain blinded until the analysis plan is signed off.  
52

### 53 54 Sample size calculation

55  
56 It is assumed that the proposed new intervention would be implemented and funded across  
57 the NHS only if it achieved at least a medium sized effect. An effect size of 0.35 is equivalent  
58 to an improvement of satisfaction ratings on the MANSA of at least one scale point (on a 7  
59  
60



1  
2  
3 point scale) for 4 out of a total of 12 life domains. An improvement of quality of life in 4 life  
4 domains is usually regarded as a meaningful difference to patients' life.[16]

5 For detecting such an effect size with 90% power, assuming a conservative ICC of 0.07 for  
6 patients treated by the same professional in the intervention group, 229 patients in the  
7 intervention group and 229 in the control group will be required (total sample = 458). A 1:1  
8 allocation ratio has been chosen for organisational ease. This requires 8 additional patients  
9 to be recruited compared to the absolute minimum required sample size with slightly uneven  
10 groups. A drop-out rate (from the study) at 6 months follow-up of 20% (in line with recent  
11 trials of similar interventions with the same patient group) (VOLUME trial) was assumed.[18]  
12 The sample size calculation was based on 10 patients being treated and followed-up per  
13 clinician on average. Based on recruiting 12 patients per clinician the final total sample size  
14 target was 576 patients (288 per arm). Recruitment and intervention delivery to SCENE  
15 were paused during the Covid-19 pandemic making a study extension necessary (see  
16 section IMPACT OF THE COVID PANDEMIC). For this a sample size re-calculation was  
17 conducted using values observed so far for two quantities. The dropout rate was inflated  
18 from 20% to 25% (actual rate to date 24%). Cluster size in the intervention arm was reduced  
19 from 10 to 3 patients per treating professional on average allowing for observed variability in  
20 patients per professional. Using these estimates the updated total number of patients to  
21 recruit is 504.  
22  
23  
24  
25  
26  
27  
28

### 29 **Qualitative process evaluation**

30  
31 A qualitative process evaluation will be conducted, employing semi-structured interviews with  
32 a number of purposively selected patients and social coaches. Interviews will be transcribed  
33 and analysed using thematic analysis.[28]  
34  
35

36 We will interview 40 patients in the experimental group to explore experiences of the  
37 intervention and descriptions of qualitative changes in their social network, contacts and  
38 activities. A topic guide for interviews was developed with input from the LEAP. Interviews will  
39 be conducted after the end of the six-month outcome assessment, so that the interviews do  
40 not interfere with the effects of the intervention in influencing the primary outcome (quality of  
41 life at six months). Un-blinded researchers will identify participants, conduct the interviews and  
42 manage qualitative data, so researchers assessing outcomes remain blind to allocation  
43

44 We will use purposive sampling, to include patients who differ according to gender, whether  
45 they live in urban or rural settings and whether or not they completed the intervention.  
46 Sampling of social coaches will include those who have seen more than three patients and  
47 those who have seen fewer.  
48  
49

### 50 **Adherence to manual**

51  
52 Adherence to manual will be assessed through our adherence checklist. Routine  
53 documentation and audiotapes of patient-professional meetings (for consenting participants)  
54 will be compared against the clinician-reported adherence schedule to check reliability. This  
55 is a self-reported checklist of whether and how the different steps of the intervention (Box 1)  
56 are addressed. Clinicians will have addressed all the eight steps of the intervention and  
57 conducted at least three sessions with a given patient for the intervention to be deemed as  
58 completed.  
59  
60

## Economic evaluation

The within trial analysis will adopt the NHS and Personal Social Services perspective to assess the cost-effectiveness of the psychosocial intervention for patients with psychosis compared to best standard practice.[29] The evaluation will focus on the 18 months from baseline until the end of the follow-up period. The analysis will adhere to guidelines for good economic evaluation practice as outlined in Ramsey et al.[30] and Sanders et al.[31]

Resource-use associated with delivery of the interventions in both trial arms will be identified using a specially designed intervention implementation form. Participants' use of health services, including mental health and hospital care, will be extracted from the NHS Digital database. All participants will be asked to complete a modified version of the Client Services Receipt Inventory to obtain information about their of other psychosocial interventions, medication and receipt of informal care from families and friends. The quantities of all resource use will be combined with unit costs to generate cost at the individual participant level. Unit costs will be obtained from various sources, including a specially designed coach demographics questionnaire, NHS Reference costs,[32] Unit Costs of Health and Social Care,[33] NHS drug Tariff,[34] and the UK earnings data.[35]

As for outcomes, the primary outcome measure for the economic evaluation will be collected using the EQ-5D-5L instrument.[23] We will calculate the participant level Quality Adjusted Life Years (QALYs) and use the EQ-5D-5L data with the area-under-the-curve approach.[36] The secondary outcome will be measured using the MANSA. The time points for collecting costs and outcome data are reported in Table 2.

Both costs and outcomes occurring during the last 6 months of the follow-up period will be discounted at 3.5% in line with the NICE recommendation.[29] Costs and outcome data will be analysed by treatment allocation, and differences between trial arms will be estimated over 18-months, adjusting for baseline differences using regression analysis. We will select an appropriate method to handle missing data based on the nature of our data.

Cost-utility analysis and cost-effectiveness analysis will be applied in the economic evaluation. In the cost-utility analysis, the estimates of incremental cost-effectiveness ratio (ICER) for the psychosocial intervention compared to best standard practice will be presented against the decision maker's willingness to pay a value of £20,000 to £30,000 per QALY.[23] To report the uncertainty of the point estimate of ICER, we will use the non-parametric bootstrap approach to estimate the confidence interval around the ICER. We will also present the probability that the intervention is cost-effective against a range of decision makers' willingness to pay value using the cost effectiveness acceptability curve. In the cost-effectiveness analysis, we will calculate the incremental cost per unit change on the MANSA scale and uncertainty surrounding the ratio.

A number of sensitivity analyses to assess the impact of key assumptions as well as uncertainty with key parameters in the economic evaluation will be conducted to (1) explore the impact of alternative assumptions about the missing data mechanism; (2) consider uncertainty in the most important cost drivers to assess the impact of healthcare use; (3) use

1  
2  
3 a broader analytical perspective by including additional costs for informal care; (4) use 0 to 6  
4 months from randomisation as the time period for economic evaluation.  
5  
6  
7

## 8 **ETHICS AND DISSEMINATION**

9  
10 The study was reviewed and a favourable opinion received from the London Hampstead NHS  
11 Research Ethics Committee [19/LO/0088]. Any serious adverse events are recorded in  
12 specific forms and their relationship with the intervention are adjudicated by site leads who  
13 are all senior clinicians. Written informed consent is provided by participants after discussion  
14 with researchers. A model consent form is enclosed as Supplementary Document.

15  
16 Any personal information stored in locked cabinets on NHS premises if in paper version, and  
17 encrypted if in electronic version. Dataset will be accessed by the study team and after the  
18 primary analysis may be made available to other parties subject to data sharing agreements.  
19

20  
21 Throughout all phases of the research, we will disseminate information about the activities of the  
22 programme through social media and a project specific website (<http://scene.elft.nhs.uk/>) in order  
23 to reach a wider public audience. Authorship guidelines for outputs will follow the ICMJE  
24 guidelines.  
25

26  
27 When results become available, they will be disseminated through:

- 28 • scientific publications in peer-reviewed open-access journals;
- 29 • presentations at national and international conferences and to professional and non-  
30 professional audiences at appropriate events;
- 31 • existing networks, including but not limited to the World Health Organisation, the  
32 benchmarking network in mental health, organisations involved in Quality Improvement  
33 programmes and the professional networks of the programme management group  
34 members.  
35  
36  
37  
38

## 39 **IMPACT OF THE COVID PANDEMIC**

40  
41 Following the outbreak of COVID-19 in the United Kingdom, recruitment was stopped from  
42 16/3/2020 to 01/10/2020. We decided to stop the intervention delivery from 16/3/2020 to  
43 21/8/2020 in accordance with social distancing guidelines at that time.

44  
45 We added an additional follow-up at 10 months from randomisation for those participants who  
46 had already been randomised when the study was stopped, but had not completed the  
47 treatment period. A sensitivity analysis will consider end-of-treatment as the outcome of  
48 comparison, and hence include the assessment of quality of life at 10 months from  
49 randomisation rather than at 6 months for these participants.  
50

51 We created additional adapted versions (used separately from the standard ones) of the  
52 Social Contact Assessment and of the Time Use Survey and data collected will be analysed  
53 to capture online social contacts and activities throughout the trial.

54  
55 The recruitment and randomisation of participants was resumed on 01/10/2020. Additional  
56 instructions to social coaches were provided on physical distancing with patients and on how  
57 to encourage social activities which are either online or can be carried in accordance with  
58 different scenarios and different physical distancing directives.  
59  
60

1  
2  
3 Research follow-up of participants at different timepoints was never stopped and continued  
4 over the phone or via video-conferencing.

5 We have calculated that 70 participants may have been especially affected by the COVID-19  
6 pandemic in that their primary outcome was assessed at a time when restrictions meant that  
7 they could not meet more than one person outside of their household.

8 To adjust for any pandemic effects on the intervention itself, the outcomes or both, a sensitivity  
9 analysis will adopt a mixed-effects model approach, grouping participants according to the  
10 physical distancing guidance that they have been exposed to. Individual treatment effect  
11 estimates of participant groups with different levels of exposure will be calculated.  
12  
13  
14

## 15 16 **DISCUSSION**

17  
18 This study addresses a gap in mental health care provision, i.e. the lack of treatments available  
19 to help patients overcome their social isolation<sup>4</sup>. It has broad inclusion criteria and is carried  
20 out across a large number of urban, semi-urban and rural sites. This will allow to control by  
21 design a number of patient-level (e.g. financial and clinical status) and area-level  
22 characteristics (e.g. availability of affordable activities, distance and travel required to access  
23 them) which might influence intervention effectiveness. The active control condition, i.e. the  
24 provision of comprehensive information on local social activities, does not only control for  
25 service attention to social activity and information provision, but also arguably represents a  
26 reflection of best current practice.  
27  
28  
29

30 The methodological choices made when designing the study come with some limitations:

- 31  
32
- 33 - Older people and those who are not fluent in the language of their country of residence  
34 encounter additional barriers to socialisation. Hence, we restricted inclusion criteria to  
35 patients with psychotic disorders of working age and to those who are fluent in English,  
36 to limit heterogeneity of our sample. Future trials and/or implementation studies should  
37 target these populations specifically.
  - 38 - The new intervention has been implemented in services directly as part of the trial.  
39 Social coaches are trained but do not have previous experience in delivering this type  
40 of approach.  
41  
42

43 In addition to this, the COVID-19 outbreak meant that more of the intervention has to be  
44 delivered remotely than originally envisaged, and we do not know whether and how that will  
45 impact on outcomes. We have a sensitivity analysis to estimate this as explained in detail in  
46 the following paragraph.  
47  
48

49 If the intervention is found to be effective in increasing social contacts and improving quality  
50 of life, it can promptly become part of the therapeutic armamentarium of mental health  
51 services. The flexibility of the approach, which can be delivered by different type of  
52 professionals, might facilitate its uptake within the ever evolving landscape of mental health  
53 services. In line with the design of the trial, we do not intend for the social coach to become  
54 be a new professional role in itself. Instead, the function of social coaches can be taken on by  
55 different professionals and exercised along with other clinical activities.  
56  
57  
58  
59  
60

## AUTHORS' CONTRIBUTIONS

Giacco led the study protocol development and is the Chief Investigator. Priebe led the intervention development and is the programme co-lead. Mortimer and Hamborg led the statistical analysis plans. Feng led the health economy analysis section. Chevalier, Patterson, Webber and Xanthopoulou contributed to intervention development and study protocol development. All authors provided intellectual input to the paper and approved its final version.

## FUNDING STATEMENT

This research is funded by the National Institute for Health Research Programme Grants for Applied Research funding stream (award number: RP-PG-0615-20009). This article reflects views of the authors and not necessarily those of the NIHR. The NIHR and the study sponsor (Eats London NHS Foundation Trust) had no role in in study design, data collection, management or analysis, and interpretation of data or in the writing of the report or the decision to submit the report for publication.

## COMPETING INTERESTS STATEMENT

The authors declare no competing interests.

## REFERENCES

- 1 McCrone P, Dhanasiri S, Patel A, et al. Paying the Price: The Cost of Mental Health Care in England to 2026. King's Fund 2008.  
[https://www.kingsfund.org.uk/sites/default/files/Paying-the-Price-the-cost-of-mental-health-care-England-2026-McCrone-Dhanasiri-Patel-Knapp-Lawton-Smith-Kings-Fund-May-2008\\_0.pdf](https://www.kingsfund.org.uk/sites/default/files/Paying-the-Price-the-cost-of-mental-health-care-England-2026-McCrone-Dhanasiri-Patel-Knapp-Lawton-Smith-Kings-Fund-May-2008_0.pdf) [accessed Feb 2021]
- 2 Palumbo C, Volpe U, Matanov A, et al. Social: networks of patients with psychosis: a systematic review. *BMC Res Notes* 2015;8:560.
- 3 Degnan A, Berry K, Sweet D, et al. Social networks and symptomatic and functional outcomes in schizophrenia: a systematic review and meta-analysis. *Soc Psychiatry Psychiatr Epidemiol* 2018; 53(9):873-888.
- 4 National Institute for Health and Care Excellence (NICE). Psychosis and Schizophrenia in Adults: prevention and management 2014; [CG178].  
<https://www.nice.org.uk/guidance/cg178/evidence/full-guideline-490503565> [accessed Feb 2021]
- 5 Bengtsson-Tops A, Hansson L. Quantitative and qualitative aspects of the social network in schizophrenic patients living in the community. Relationship to sociodemographic characteristics and clinical factors and subjective quality of life. *International Journal of Social Psychiatry* 2001;47(3):67-77.
- 6 Norman R.M, Malla A.K, Manchanda R, et al. Social support and three-year symptom and admission outcomes for first episode psychosis. *Schizophrenia Research* 2005; 80(2-3):227-34.
- 7 Anderson K, Laxhman N, Priebe S. Can mental health interventions change social networks? A systematic review. *BMC Psychiatry (Open Access)* 2015; 15:297.



- 1
  - 2
  - 3
  - 4
  - 5
  - 6
  - 7
  - 8
  - 9
  - 10
  - 11
  - 12
  - 13
  - 14
  - 15
  - 16
  - 17
  - 18
  - 19
  - 20
  - 21
  - 22
  - 23
  - 24
  - 25
  - 26
  - 27
  - 28
  - 29
  - 30
  - 31
  - 32
  - 33
  - 34
  - 35
  - 36
  - 37
  - 38
  - 39
  - 40
  - 41
  - 42
  - 43
  - 44
  - 45
  - 46
  - 47
  - 48
  - 49
  - 50
  - 51
  - 52
  - 53
  - 54
  - 55
  - 56
  - 57
  - 58
  - 59
  - 60
- 8 Fusar-Poli P, Papanastasiou E, Stahl D, et al. Treatments of Negative Symptoms in Schizophrenia: Meta-Analysis of 168 Randomized Placebo-Controlled Trials. *Schizophr Bull* 2015; 41(4):892-9.
- 9 Almerie M.Q, Okba Al Marhi M, Jawoosh M, et al. Social skills programmes for schizophrenia. *Cochrane Database of Systematic Reviews* 2015; 2015(6):CD009006
- 10 Castelein S, Bruggeman R, Van Busschbach JT, et al. The effectiveness of peer support groups in psychosis: A randomized controlled trial. *Acta Psychiatr Scand* 2008;118:64–72
- 11 Terzian E, Tognoni G, Bracco R, et al. Social Network Intervention in Patients With Schizophrenia and Marked Social Withdrawal: A Randomized Controlled Study. *Can J Psychiatry* 2013;58:622–631.
- 12 Sheridan AJ, Drennan J, Coughlan B et al., Improving social functioning and reducing social isolation and loneliness among people with enduring mental illness: Report of a randomised controlled trial of supported socialisation. *Int J Soc Psychiatry* 2014;61(3):241-50.
- 13 Hasson-Ohayon I, Mashiach-Eizenberg M, Avidan M, et al. Social Cognition and Interaction Training: Preliminary Results of an RCT in a Community Setting in Israel. *Psychiatr Serv* 2014;65:555–558.
- 14 Giacco D, Priebe S. Using Routine Quality of Life Assessment to Improve Effectiveness of Community Mental Health Care. In: Awad AG, Voruganti LNP, eds. *Beyond Assessment of Quality of Life in Schizophrenia*. Springer International Publishing Switzerland 2016:145-155.
- 15 Tee H, Priebe S, Santos C, et al. Helping people with psychosis to expand their social networks: the stakeholders' views. *BMC Psychiatry* 2020;20(1):29.
- 16 Priebe S, Kellye L, Omer S, et al. The Effectiveness of a Patient-Centred Assessment with a Solution-Focused Approach (DIALOG+) for Patients with Psychosis: A Pragmatic Cluster-Randomised Controlled Trial in Community Care. *Psychotherapy and Psychosomatics* 2015;84:304-313.
- 17 Giacco D, Palumbo C, Strappelli N, et al. Social contacts and loneliness in people with psychotic and mood disorders. *Compr Psychiatry* 2016;66:59-66.
- 18 Priebe S, Chevalier A, Hamborg T, et al. Effectiveness of a volunteer befriending programme for patients with schizophrenia: randomised controlled trial. *The British Journal of Psychiatry*. Cambridge University Press; 2020;217(3):477–83.
- 19 Kay S. *Positive and Negative Syndromes in Schizophrenia*. New York: Brunner/Mazel 1991.
- 20 Priebe S, Watzke S, Hansson L, et al. Objective social outcomes index (SIX): a method to summarise objective indicators of social outcomes in mental health care. *Acta Psychiatr Scand* 2008;118(1):57-63.
- 21 Hays R.D, DiMatteo M.R. A short-form measure of loneliness. *Journal of personality assessment* 1987;51(1):69-81.
- 22 Priebe S, Pavlickova H, Eldridge S, et al. Effectiveness of one-to-one volunteer support for patients with psychosis: protocol of a randomised controlled trial. *BMJ open* 2016;6(8).
- 23 Herdman M, Gudex C, Lloyd A, et al. Development and preliminary testing of the new five-level version of EQ-5D (EQ-5D-5L) *Qual Life Res* 2011;20:1727–36.
- 24 Beecham J, Knapp M. Costing psychiatric interventions. In: Thornicroft G, eds. *Measuring Mental Health Needs*. Gaskell, 2nd edition 2001:200-224.

- 1  
2  
3  
4 25 NHS Digital. Secondary Uses Service (SUS). Available from  
5 <https://digital.nhs.uk/services/secondary-uses-service-sus> [accessed Feb 2021].  
6  
7 26 Candlish J, Teare M.D, Dimairo M, et al. Appropriate statistical methods for  
8 analysing partially nested randomised controlled trials with continuous outcomes:  
9 a simulation study. *BMC Med Res Methodol* 2018;18:105.  
10  
11 27 Fritz CO, Morris PE, Richler JJ. Effect size estimates: current use, calculations,  
12 and interpretation. *J Exp Psychol Gen* 2012;141(1):2-18.  
13  
14 28 Braun V, Clarke V. Using thematic analysis in psychology. *Qualitative Research*  
15 *in Psychology* 2006;3(2):77–101.  
16  
17 29 National Institute for Health and Care Excellence (NICE). Guide to the methods  
18 of technology appraisal 2013;  
19 [https://www.nice.org.uk/process/pmg9/resources/guide-to-the-methods-of-](https://www.nice.org.uk/process/pmg9/resources/guide-to-the-methods-of-technology-appraisal-2013-pdf-2007975843781)  
20 [technology-appraisal-2013-pdf-2007975843781](https://www.nice.org.uk/process/pmg9/resources/guide-to-the-methods-of-technology-appraisal-2013-pdf-2007975843781) [accessed Aug 2020]  
21  
22 30 Ramsey S.D, Willke R.J, Glick H, et al. Cost-effectiveness analysis alongside  
23 clinical trials II-an ISPOR good research practices task force report. *Value Health*  
24 2015;18(2):161–172.  
25  
26 31 Sanders GD, Neumann PJ, Basu A, et al. Recommendations for conduct,  
27 methodological practices, and reporting of cost-effectiveness analyses: second  
28 panel on cost-effectiveness in health and medicine. *JAMA* 2016;316(10):1093–  
29 1103.  
30  
31 32 NHS improvement. National Cost Collection for the NHS.  
32 <https://www.england.nhs.uk/national-cost-collection/> [accessed Aug 2020]  
33  
34 33 Curtis L, Burns A. Unit Costs of Health and Social Care 2019;  
35 <https://www.pssru.ac.uk/project-pages/unit-costs/unit-costs-2019/> [accessed Aug  
36 2020]  
37  
38 34 NHS Business Service Authority. Drug Tariff online.  
39 [https://www.nhsbsa.nhs.uk/pharmacies-gp-practices-and-appliance-](https://www.nhsbsa.nhs.uk/pharmacies-gp-practices-and-appliance-contractors/drug-tariff)  
40 [contractors/drug-tariff](https://www.nhsbsa.nhs.uk/pharmacies-gp-practices-and-appliance-contractors/drug-tariff) [accessed Aug 2020]  
41  
42 35 Office for National Statistics. Earnings and working hours.  
43 [https://www.ons.gov.uk/employmentandlabourmarket/peopleinwork/earningsand](https://www.ons.gov.uk/employmentandlabourmarket/peopleinwork/earningsandworkinghours)  
44 [workinghours](https://www.ons.gov.uk/employmentandlabourmarket/peopleinwork/earningsandworkinghours) [accessed Aug 2020]  
45  
46 36 Matthews JN, Altman DG, Campbell MJ, et al. Analysis of serial measurements in  
47 medical research. *BMJ* 1990;300:230–235  
48  
49  
50  
51  
52  
53  
54  
55  
56  
57  
58  
59  
60

**Table 1. Trial sites**

|                                                                     |
|---------------------------------------------------------------------|
| East London NHS Foundation Trust (two sites: East London and Luton) |
| Tees, Esk and Wear valleys NHS Foundation Trust                     |
| Devon Partnership NHS Trust                                         |
| Cornwall NHS Partnership NHS Trust                                  |
| Oxford Health NHS Foundation Trust                                  |
| Somerset NHS Foundation Trust                                       |
| Leeds and York NHS Foundation Trust                                 |
| Humber Taching NHS Foundation Trust                                 |
| Gloucestershire Health and Care NHS Foundation Trust                |
| Coventry and Warwickshire Partnership NHS Trust                     |
| Lincolnshire Partnership NHS Trust                                  |



**Table 2. SCENE Study outcomes and timepoints.**

| Assessment                            | Screening | Baseline | Study phase (6 months) | Follow up (12 months) | Follow up (18 months) |
|---------------------------------------|-----------|----------|------------------------|-----------------------|-----------------------|
| <b>All Patient Participants</b>       |           |          |                        |                       |                       |
| MANSA                                 | <b>x</b>  | <b>x</b> | <b>x</b>               | <b>x</b>              | <b>x</b>              |
| Social Contacts Assessment            | <b>x</b>  | <b>x</b> | <b>x</b>               | <b>x</b>              | <b>x</b>              |
| PANSS                                 |           | <b>x</b> | <b>x</b>               | <b>x</b>              | <b>x</b>              |
| Social situation                      |           | <b>x</b> | <b>x</b>               | <b>x</b>              | <b>x</b>              |
| Loneliness                            |           | <b>x</b> | <b>x</b>               | <b>x</b>              | <b>x</b>              |
| Time spent in social activities       |           | <b>x</b> | <b>x</b>               | <b>x</b>              | <b>x</b>              |
| EQ-5D-5L                              |           | <b>x</b> | <b>x</b>               | <b>x</b>              | <b>x</b>              |
| Client Service Receipt Inventory      |           | <b>x</b> | <b>x</b>               | <b>x</b>              | <b>x</b>              |
| Healthcare source use (NHS Digital)   |           | <b>x</b> | <b>x</b>               | <b>x</b>              | <b>x</b>              |
| <b>Intervention Participants only</b> |           |          |                        |                       |                       |
| Semi-structured interviews            |           |          | <b>x</b>               |                       |                       |
| <b>Social coaches</b>                 |           |          |                        |                       |                       |
| Adherence schedule                    |           |          | <b>x</b>               |                       |                       |
| Semi-Structured Interviews            |           |          | <b>x</b>               |                       |                       |

## Box 1. SCENE Social coaching intervention: the eight step approach

**1) Introduction:** The social coach and the patient introduce themselves.

**2) Clarification of the remit of the intervention:** The professional explains and discusses the focused remit of the intervention, i.e. that it aims to expand social networks and that all other therapeutic issues have to be addressed elsewhere.

**3) Exploration of past and current activities:** The social coach explores past activities that involved social contacts; this should be done chronologically covering the adult life time of the patient from the age of 15 years onwards, and stepwise for periods of 5 – 10 years. At the end of the exploration, professional and patient go through the list of activities (if any) and discuss to what extent the patient enjoyed each activity. Solution focused therapy techniques (e.g. identifying what went well and what worked) can be used.

**4) Motivation for change:** The professional explores and discusses the patient's motivation to change and expand their social networks. Motivational interviewing techniques (e.g. identifying change talk) can be used.

**5) Options for activities:** Professional and patient discuss which new activities (or expanding existing ones respectively) the patient considers.

**6) Information:** The professional provides as much helpful information as possible about options in the given locality for patients' preferred activities. Professional and patient discuss the practicalities and sometimes decide to obtain further information. In this step, the patient is encouraged and supported to find information him/herself. Yet, if this is a substantial hurdle, the professional provides as much direct support as needed.

**7) Consideration and decision:** Once options have been identified, the patient is asked to consider taking it up. If the patient is ambivalent, patients are encouraged to take time, e.g. a week until the next meeting or a phone call, to think about it.

**8) Definition of activity:** Finally, the patient decides on the type of activity and some specification of the actual steps (e.g. twice per week attending a certain class, but not necessarily on which days), so that professional and patient can assess afterwards whether the activity has been completed or not. The task gets documented for the patient, e.g. written on a piece of paper that the patient takes along.

### How are the steps covered during the sessions?

There is some flexibility as to how much time each step takes and to what extent they are covered within the monthly sessions varies.

Session 1: Usually, the first meeting would end with steps 5 or 6.

Session 2: After the second meeting an activity is agreed upon. However, it is allowed that patients and professional leave the decision to a third session or take it during the first session if this is possible.

Session 3-6 (follow-up sessions): During follow-up sessions, social coach and patient discuss to what extent the activity has been done. The social coach provides positive feedback and – if required – deals with complete or partial perceived failure using solution focused techniques (e.g. emphasising what went well).

After three months (i.e. session 3-4), the situation is re-evaluated. If the activity is working well, then this is monitored in further follow-up sessions. In case professional and patient come to the conclusion that the originally planned activity does not work, a face-to-face meeting is arranged in which steps 4 to 8 of the initial meetings are repeated and a different activity is planned.

1  
2  
3 **FIGURE LEGEND**  
4

5 **Figure 1. Theoretical model of intervention processes**  
6  
7  
8  
9  
10  
11  
12  
13  
14  
15  
16  
17  
18  
19  
20  
21  
22  
23  
24  
25  
26  
27  
28  
29  
30  
31  
32  
33  
34  
35  
36  
37  
38  
39  
40  
41  
42  
43  
44  
45  
46  
47  
48  
49  
50  
51  
52  
53  
54  
55  
56  
57  
58  
59  
60

For peer review only

Adapted from the iterative model of self regulation proposed by Carver and Scheier, 1998

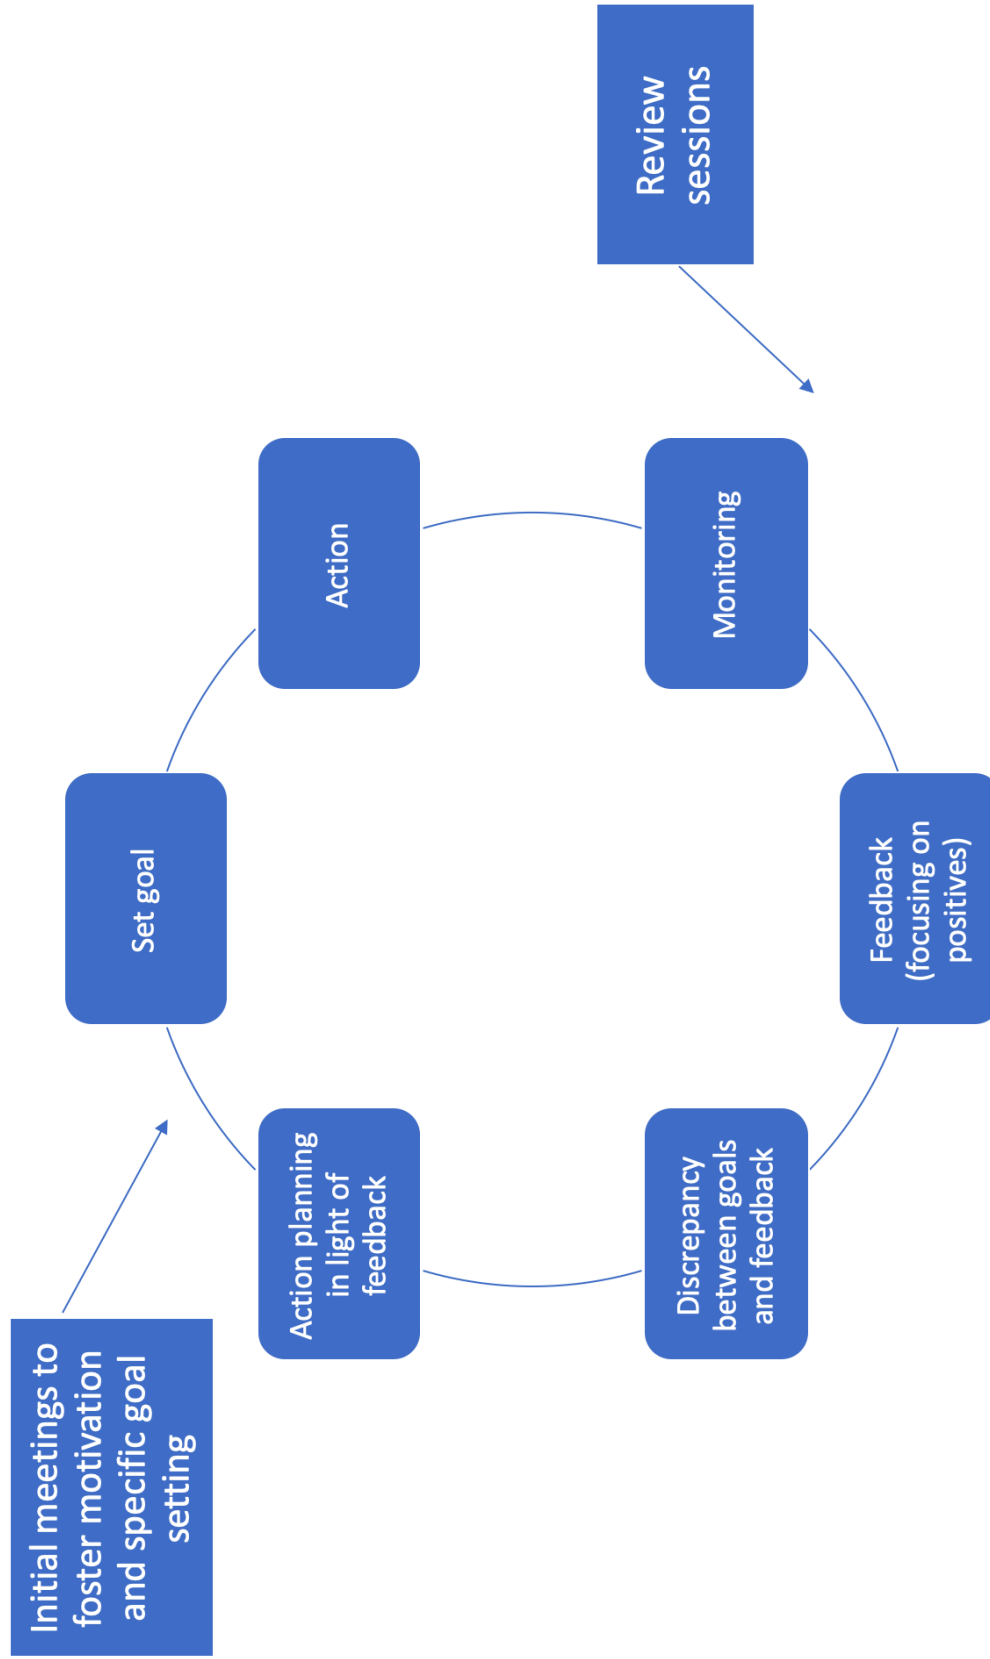

Carver CS, Scheier MF. On the self-regulation of behavior. Cambridge: Cambridge University Press, 1998.

1  
2  
3  
4  
5  
6  
7  
8  
9  
10  
11  
12  
13  
14  
15  
16  
17  
18  
19  
20  
21  
22  
23  
24  
25  
26  
27  
28  
29  
30  
31  
32  
33  
34  
35  
36  
37  
38  
39  
40  
41  
42  
43  
44  
45  
46  
47  
48  
49  
50  
51  
52  
53  
54  
55  
56  
57  
58  
59  
60

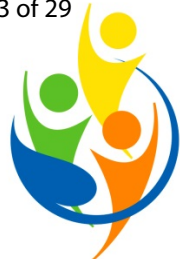

# SCENE

Enhancing social networks,  
improving quality of life

[INSERT TRUST LOGO]

1  
2  
3  
4  
5  
6  
7  
8  
9  
10  
11  
12  
13  
14  
15  
16  
17  
18  
19  
20  
21  
22  
23  
24  
25  
26  
27  
28  
29  
30  
31  
32  
33  
34  
35  
36  
37  
38  
39  
40  
41  
42  
43  
44  
45  
46  
47  
48  
49  
50  
51  
52  
53  
54  
55  
56  
57  
58  
59  
60

## Service User Consent Form Randomised Control Trial of a Structured Intervention For Expanding Social Networks in Psychosis (SCENE WP5)

Please **initial** box  
(OR researcher to tick  
for remote consent)

1. I confirm that I have read and understand the information sheet dated 24/09/20 Version 3.0 for the above study. I have had the opportunity to ask the researcher questions and these questions have been answered to my satisfaction.

2. I understand that my participation is voluntary and that I am free to withdraw at any time without giving any reason and without my treatment or legal rights being affected.

3. I agree that if I withdraw, or am withdrawn from the study for any reason, then researchers can continue to use the information I have already given them unless I contact them before the end of July 2022

4. I understand that if I decide to stop the SCENE intervention, researchers can contact me to find out the reasons why but I am under no obligation to share this information.

5. I understand that all information will be kept confidential. My personal data will only be accessed by the study team on a need to know basis. The research data will be kept for 20 years but from this, I can only be identified by a study ID code. I understand that confidentiality will need to be broken if there is a concern for risk to other people or to myself, or if criminal disclosures are made.

6. I agree that members of the research team at **East London NHS Foundation Trust** may access my medical records to obtain basic information about me.

7. I agree to take part in the above study.

Please **turn over** to finish completing this form

Items 8-11 are **optional**. You do not have to agree to these if you do not want to. Please only **initial the boxes** for the items that you agree to.

8. I agree to be interviewed about my experiences of the SCENE intervention and for my interview to be audio recorded. I understand that the recording will be typed-up and any personal information destroyed. I agree that anonymised quotations from the interviews will be used to share the research findings.

9. I agree for initial sessions of the SCENE intervention with a trained mental health professional to be audio-recorded. I understand that I will be asked for permission before each recorded session and that I am free to refuse or stop the recording at any time.

10. I understand that personal information collected about me including date of birth, NHS number and postcode will be sent to the sponsor to obtain information about my service use for the purpose of this research.

11. I agree to my General Practitioner (GP) being informed of my participation in this study.

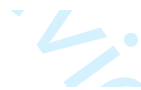

\_\_\_\_\_  
Name of Participant

\_\_\_\_\_  
Date

\_\_\_\_\_  
Signature  
(OR *provided electronically by the researcher, on behalf of the participant for remote consent*)

I have explained the study to the participant and have answered the participant's questions honestly and fully

\_\_\_\_\_  
Name of Researcher

\_\_\_\_\_  
Date

\_\_\_\_\_  
Signature

Original for investigator site file, 1 copy for participant, 1 copy for medical records

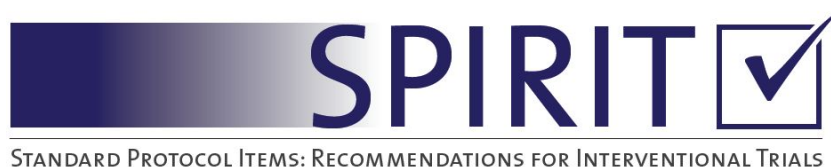

STANDARD PROTOCOL ITEMS: RECOMMENDATIONS FOR INTERVENTIONAL TRIALS

SPIRIT 2013 Checklist: Recommended items to address in a clinical trial protocol and related documents\*

| Section/item                      | Item No. | Page No.                          | Description                                                                                                                                                                                                                                                                              |
|-----------------------------------|----------|-----------------------------------|------------------------------------------------------------------------------------------------------------------------------------------------------------------------------------------------------------------------------------------------------------------------------------------|
| <b>Administrative information</b> |          |                                   |                                                                                                                                                                                                                                                                                          |
| Title                             | 1        | 1                                 | Descriptive title identifying the study design, population, interventions, and, if applicable, trial acronym                                                                                                                                                                             |
| Trial registration                | 2a       | 2                                 | Trial identifier and registry name. If not yet registered, name of intended registry                                                                                                                                                                                                     |
|                                   | 2b       | N/A (trial is ongoing)            | All items from the World Health Organization Trial Registration Data Set                                                                                                                                                                                                                 |
| Protocol version                  | 3        | Date will be in published version | Date and version identifier                                                                                                                                                                                                                                                              |
| Funding                           | 4        | 14                                | Sources and types of financial, material, and other support                                                                                                                                                                                                                              |
| Roles and responsibilities        | 5a       | 1,14                              | Names, affiliations, and roles of protocol contributors                                                                                                                                                                                                                                  |
|                                   | 5b       | 5                                 | Name and contact information for the trial sponsor                                                                                                                                                                                                                                       |
|                                   | 5c       | 14                                | Role of study sponsor and funders, if any, in study design; collection, management, analysis, and interpretation of data; writing of the report; and the decision to submit the report for publication, including whether they will have ultimate authority over any of these activities |
|                                   | 5d       | 9                                 | Composition, roles, and responsibilities of the coordinating centre, steering committee, endpoint adjudication committee, data management team, and other individuals or groups overseeing the trial, if applicable (see Item 21a for data monitoring committee)                         |

## Introduction



|    |                      |     |            |                                                                                                                                                                                                           |
|----|----------------------|-----|------------|-----------------------------------------------------------------------------------------------------------------------------------------------------------------------------------------------------------|
| 1  |                      |     |            |                                                                                                                                                                                                           |
| 2  | Background           | 6a  | 4          | Description of research question and justification for undertaking the trial, including summary of relevant studies (published and unpublished) examining benefits and harms for each intervention        |
| 3  | and rationale        |     |            |                                                                                                                                                                                                           |
| 4  |                      |     |            |                                                                                                                                                                                                           |
| 5  |                      |     |            |                                                                                                                                                                                                           |
| 6  |                      |     |            |                                                                                                                                                                                                           |
| 7  |                      |     |            |                                                                                                                                                                                                           |
| 8  |                      |     |            |                                                                                                                                                                                                           |
| 9  |                      | 6b  | 7          | Explanation for choice of comparators                                                                                                                                                                     |
| 10 | Objectives           | 7   | 4,5        | Specific objectives or hypotheses                                                                                                                                                                         |
| 11 |                      |     |            |                                                                                                                                                                                                           |
| 12 | Trial design         | 8   | 5          | Description of trial design including type of trial (eg, parallel group, crossover, factorial, single group), allocation ratio, and framework (eg, superiority, equivalence, noninferiority, exploratory) |
| 13 |                      |     |            |                                                                                                                                                                                                           |
| 14 |                      |     |            |                                                                                                                                                                                                           |
| 15 |                      |     |            |                                                                                                                                                                                                           |
| 16 |                      |     |            |                                                                                                                                                                                                           |
| 17 |                      |     |            |                                                                                                                                                                                                           |
| 18 |                      |     |            |                                                                                                                                                                                                           |
| 19 |                      |     |            |                                                                                                                                                                                                           |
| 20 |                      |     |            |                                                                                                                                                                                                           |
| 21 |                      |     |            | <b>Methods: Participants, interventions, and outcomes</b>                                                                                                                                                 |
| 22 |                      |     |            |                                                                                                                                                                                                           |
| 23 | Study setting        | 9   | 5, Table 1 | Description of study settings (eg, community clinic, academic hospital) and list of countries where data will be collected. Reference to where list of study sites can be obtained                        |
| 24 |                      |     |            |                                                                                                                                                                                                           |
| 25 |                      |     |            |                                                                                                                                                                                                           |
| 26 |                      |     |            |                                                                                                                                                                                                           |
| 27 |                      |     |            |                                                                                                                                                                                                           |
| 28 | Eligibility criteria | 10  | 5          | Inclusion and exclusion criteria for participants. If applicable, eligibility criteria for study centres and individuals who will perform the interventions (eg, surgeons, psychotherapists)              |
| 29 |                      |     |            |                                                                                                                                                                                                           |
| 30 |                      |     |            |                                                                                                                                                                                                           |
| 31 |                      |     |            |                                                                                                                                                                                                           |
| 32 |                      |     |            |                                                                                                                                                                                                           |
| 33 |                      |     |            |                                                                                                                                                                                                           |
| 34 | Interventions        | 11a | 6,7, Box 1 | Interventions for each group with sufficient detail to allow replication, including how and when they will be administered                                                                                |
| 35 |                      |     |            |                                                                                                                                                                                                           |
| 36 |                      |     |            |                                                                                                                                                                                                           |
| 37 |                      |     |            |                                                                                                                                                                                                           |
| 38 |                      |     |            |                                                                                                                                                                                                           |
| 39 |                      | 11b | 7          | Criteria for discontinuing or modifying allocated interventions for a given trial participant (eg, drug dose change in response to harms, participant request, or improving/worsening disease)            |
| 40 |                      |     |            |                                                                                                                                                                                                           |
| 41 |                      |     |            |                                                                                                                                                                                                           |
| 42 |                      |     |            |                                                                                                                                                                                                           |
| 43 |                      |     |            |                                                                                                                                                                                                           |
| 44 |                      |     |            |                                                                                                                                                                                                           |
| 45 |                      | 11c | 10         | Strategies to improve adherence to intervention protocols, and any procedures for monitoring adherence (eg, drug tablet return, laboratory tests)                                                         |
| 46 |                      |     |            |                                                                                                                                                                                                           |
| 47 |                      |     |            |                                                                                                                                                                                                           |
| 48 |                      |     |            |                                                                                                                                                                                                           |
| 49 |                      |     |            |                                                                                                                                                                                                           |
| 50 |                      |     |            |                                                                                                                                                                                                           |
| 51 |                      | 11d | 5          | Relevant concomitant care and interventions that are permitted or prohibited during the trial                                                                                                             |
| 52 |                      |     |            |                                                                                                                                                                                                           |
| 53 |                      |     |            |                                                                                                                                                                                                           |
| 54 |                      |     |            |                                                                                                                                                                                                           |
| 55 |                      |     |            |                                                                                                                                                                                                           |
| 56 |                      |     |            |                                                                                                                                                                                                           |
| 57 |                      |     |            |                                                                                                                                                                                                           |
| 58 |                      |     |            |                                                                                                                                                                                                           |
| 59 |                      |     |            |                                                                                                                                                                                                           |
| 60 |                      |     |            |                                                                                                                                                                                                           |

|    |              |     |             |                                                    |
|----|--------------|-----|-------------|----------------------------------------------------|
| 1  |              |     |             |                                                    |
| 2  | Outcomes     | 12  | 7,8         | Primary, secondary, and other outcomes,            |
| 3  |              |     |             | including the specific measurement variable (eg,   |
| 4  |              |     |             | systolic blood pressure), analysis metric (eg,     |
| 5  |              |     |             | change from baseline, final value, time to event), |
| 6  |              |     |             | method of aggregation (eg, median, proportion),    |
| 7  |              |     |             | and time point for each outcome. Explanation of    |
| 8  |              |     |             | the clinical relevance of chosen efficacy and      |
| 9  |              |     |             | harm outcomes is strongly recommended              |
| 10 |              |     |             |                                                    |
| 11 |              |     |             |                                                    |
| 12 | Participant  | 13  | Table 2     | Time schedule of enrolment, interventions          |
| 13 | timeline     |     |             | (including any run-ins and washouts),              |
| 14 |              |     |             | assessments, and visits for participants. A        |
| 15 |              |     |             | schematic diagram is highly recommended (see       |
| 16 |              |     |             | Figure)                                            |
| 17 |              |     |             |                                                    |
| 18 |              |     |             |                                                    |
| 19 | Sample size  | 14  | 9,10        | Estimated number of participants needed to         |
| 20 |              |     |             | achieve study objectives and how it was            |
| 21 |              |     |             | determined, including clinical and statistical     |
| 22 |              |     |             | assumptions supporting any sample size             |
| 23 |              |     |             | calculations                                       |
| 24 |              |     |             |                                                    |
| 25 |              |     |             |                                                    |
| 26 | Recruitment  | 15  | 9,10, 12-14 | Strategies for achieving adequate participant      |
| 27 |              |     |             | enrolment to reach target sample size              |
| 28 |              |     |             |                                                    |
| 29 |              |     |             |                                                    |
| 30 |              |     |             | <b>Methods: Assignment of interventions (for</b>   |
| 31 |              |     |             | <b>controlled trials)</b>                          |
| 32 |              |     |             |                                                    |
| 33 | Allocation:  |     |             |                                                    |
| 34 |              |     |             |                                                    |
| 35 | Sequence     | 16a | 6           | Method of generating the allocation sequence       |
| 36 | generation   |     |             | (eg, computer-generated random numbers), and       |
| 37 |              |     |             | list of any factors for stratification. To reduce  |
| 38 |              |     |             | predictability of a random sequence, details of    |
| 39 |              |     |             | any planned restriction (eg, blocking) should be   |
| 40 |              |     |             | provided in a separate document that is            |
| 41 |              |     |             | unavailable to those who enrol participants or     |
| 42 |              |     |             | assign interventions                               |
| 43 |              |     |             |                                                    |
| 44 |              |     |             |                                                    |
| 45 | Allocation   | 16b | 6           | Mechanism of implementing the allocation           |
| 46 | concealment  |     |             | sequence (eg, central telephone; sequentially      |
| 47 | mechanism    |     |             | numbered, opaque, sealed envelopes),               |
| 48 |              |     |             | describing any steps to conceal the sequence       |
| 49 |              |     |             | until interventions are assigned                   |
| 50 |              |     |             |                                                    |
| 51 |              |     |             |                                                    |
| 52 | Implementati | 16c | 6           | Who will generate the allocation sequence, who     |
| 53 | on           |     |             | will enrol participants, and who will assign       |
| 54 |              |     |             | participants to interventions                      |
| 55 |              |     |             |                                                    |
| 56 |              |     |             |                                                    |
| 57 |              |     |             |                                                    |
| 58 |              |     |             |                                                    |
| 59 |              |     |             |                                                    |
| 60 |              |     |             |                                                    |

|    |                 |     |             |                                                       |
|----|-----------------|-----|-------------|-------------------------------------------------------|
| 1  |                 |     |             |                                                       |
| 2  | Blinding        | 17a | 6           | Who will be blinded after assignment to               |
| 3  | (masking)       |     |             | interventions (eg, trial participants, care           |
| 4  |                 |     |             | providers, outcome assessors, data analysts),         |
| 5  |                 |     |             | and how                                               |
| 6  |                 |     |             |                                                       |
| 7  |                 | 17b | 6           | If blinded, circumstances under which unblinding      |
| 8  |                 |     |             | is permissible, and procedure for revealing a         |
| 9  |                 |     |             | participant's allocated intervention during the trial |
| 10 |                 |     |             |                                                       |
| 11 |                 |     |             |                                                       |
| 12 |                 |     |             | <b>Methods: Data collection, management, and</b>      |
| 13 |                 |     |             | <b>analysis</b>                                       |
| 14 |                 |     |             |                                                       |
| 15 | Data collection | 18a | 7,8         | Plans for assessment and collection of outcome,       |
| 16 | methods         |     |             | baseline, and other trial data, including any         |
| 17 |                 |     |             | related processes to promote data quality (eg,        |
| 18 |                 |     |             | duplicate measurements, training of assessors)        |
| 19 |                 |     |             | and a description of study instruments (eg,           |
| 20 |                 |     |             | questionnaires, laboratory tests) along with their    |
| 21 |                 |     |             | reliability and validity, if known. Reference to      |
| 22 |                 |     |             | where data collection forms can be found, if not      |
| 23 |                 |     |             | in the protocol                                       |
| 24 |                 |     |             |                                                       |
| 25 |                 |     |             |                                                       |
| 26 |                 |     |             |                                                       |
| 27 |                 | 18b | 7,8, 12-14  | Plans to promote participant retention and            |
| 28 |                 |     |             | complete follow-up, including list of any outcome     |
| 29 |                 |     |             | data to be collected for participants who             |
| 30 |                 |     |             | discontinue or deviate from intervention              |
| 31 |                 |     |             | protocols                                             |
| 32 |                 |     |             |                                                       |
| 33 |                 |     |             |                                                       |
| 34 | Data            | 19  | 7-9         | Plans for data entry, coding, security, and           |
| 35 | management      |     |             | storage, including any related processes to           |
| 36 |                 |     |             | promote data quality (eg, double data entry;          |
| 37 |                 |     |             | range checks for data values). Reference to           |
| 38 |                 |     |             | where details of data management procedures           |
| 39 |                 |     |             | can be found, if not in the protocol                  |
| 40 |                 |     |             |                                                       |
| 41 |                 |     |             |                                                       |
| 42 | Statistical     | 20a | 7-9         | Statistical methods for analysing primary and         |
| 43 | methods         |     |             | secondary outcomes. Reference to where other          |
| 44 |                 |     |             | details of the statistical analysis plan can be       |
| 45 |                 |     |             | found, if not in the protocol                         |
| 46 |                 |     |             |                                                       |
| 47 |                 |     |             |                                                       |
| 48 |                 | 20b | 8-11, 12-13 | Methods for any additional analyses (eg,              |
| 49 |                 |     |             | subgroup and adjusted analyses)                       |
| 50 |                 |     |             |                                                       |
| 51 |                 | 20c | 7-9         | Definition of analysis population relating to         |
| 52 |                 |     |             | protocol non-adherence (eg, as randomised             |
| 53 |                 |     |             | analysis), and any statistical methods to handle      |
| 54 |                 |     |             | missing data (eg, multiple imputation)                |
| 55 |                 |     |             |                                                       |
| 56 |                 |     |             |                                                       |
| 57 |                 |     |             | <b>Methods: Monitoring</b>                            |
| 58 |                 |     |             |                                                       |
| 59 |                 |     |             |                                                       |
| 60 |                 |     |             |                                                       |

|    |                          |     |     |                                                                                                                                                                                                                                                                                                                                       |
|----|--------------------------|-----|-----|---------------------------------------------------------------------------------------------------------------------------------------------------------------------------------------------------------------------------------------------------------------------------------------------------------------------------------------|
| 1  |                          |     |     |                                                                                                                                                                                                                                                                                                                                       |
| 2  | Data monitoring          | 21a | 9   | Composition of data monitoring committee (DMC); summary of its role and reporting structure; statement of whether it is independent from the sponsor and competing interests; and reference to where further details about its charter can be found, if not in the protocol. Alternatively, an explanation of why a DMC is not needed |
| 3  |                          |     |     |                                                                                                                                                                                                                                                                                                                                       |
| 4  |                          |     |     |                                                                                                                                                                                                                                                                                                                                       |
| 5  |                          |     |     |                                                                                                                                                                                                                                                                                                                                       |
| 6  |                          |     |     |                                                                                                                                                                                                                                                                                                                                       |
| 7  |                          |     |     |                                                                                                                                                                                                                                                                                                                                       |
| 8  |                          |     |     |                                                                                                                                                                                                                                                                                                                                       |
| 9  |                          |     |     |                                                                                                                                                                                                                                                                                                                                       |
| 10 |                          |     |     |                                                                                                                                                                                                                                                                                                                                       |
| 11 |                          |     |     |                                                                                                                                                                                                                                                                                                                                       |
| 12 |                          | 21b | 7-9 | Description of any interim analyses and stopping guidelines, including who will have access to these interim results and make the final decision to terminate the trial                                                                                                                                                               |
| 13 |                          |     |     |                                                                                                                                                                                                                                                                                                                                       |
| 14 |                          |     |     |                                                                                                                                                                                                                                                                                                                                       |
| 15 |                          |     |     |                                                                                                                                                                                                                                                                                                                                       |
| 16 |                          |     |     |                                                                                                                                                                                                                                                                                                                                       |
| 17 |                          |     |     |                                                                                                                                                                                                                                                                                                                                       |
| 18 | Harms                    | 22  | 12  | Plans for collecting, assessing, reporting, and managing solicited and spontaneously reported adverse events and other unintended effects of trial interventions or trial conduct                                                                                                                                                     |
| 19 |                          |     |     |                                                                                                                                                                                                                                                                                                                                       |
| 20 |                          |     |     |                                                                                                                                                                                                                                                                                                                                       |
| 21 |                          |     |     |                                                                                                                                                                                                                                                                                                                                       |
| 22 |                          |     |     |                                                                                                                                                                                                                                                                                                                                       |
| 23 |                          |     |     |                                                                                                                                                                                                                                                                                                                                       |
| 24 | Auditing                 | 23  | 6   | Frequency and procedures for auditing trial conduct, if any, and whether the process will be independent from investigators and the sponsor                                                                                                                                                                                           |
| 25 |                          |     |     |                                                                                                                                                                                                                                                                                                                                       |
| 26 |                          |     |     |                                                                                                                                                                                                                                                                                                                                       |
| 27 |                          |     |     |                                                                                                                                                                                                                                                                                                                                       |
| 28 |                          |     |     |                                                                                                                                                                                                                                                                                                                                       |
| 29 |                          |     |     | <b>Ethics and dissemination</b>                                                                                                                                                                                                                                                                                                       |
| 30 |                          |     |     |                                                                                                                                                                                                                                                                                                                                       |
| 31 | Research ethics approval | 24  | 12  | Plans for seeking research ethics committee/institutional review board (REC/IRB) approval                                                                                                                                                                                                                                             |
| 32 |                          |     |     |                                                                                                                                                                                                                                                                                                                                       |
| 33 |                          |     |     |                                                                                                                                                                                                                                                                                                                                       |
| 34 |                          |     |     |                                                                                                                                                                                                                                                                                                                                       |
| 35 | Protocol amendments      | 25  | 12  | Plans for communicating important protocol modifications (eg, changes to eligibility criteria, outcomes, analyses) to relevant parties (eg, investigators, REC/IRBs, trial participants, trial registries, journals, regulators)                                                                                                      |
| 36 |                          |     |     |                                                                                                                                                                                                                                                                                                                                       |
| 37 |                          |     |     |                                                                                                                                                                                                                                                                                                                                       |
| 38 |                          |     |     |                                                                                                                                                                                                                                                                                                                                       |
| 39 |                          |     |     |                                                                                                                                                                                                                                                                                                                                       |
| 40 |                          |     |     |                                                                                                                                                                                                                                                                                                                                       |
| 41 |                          |     |     |                                                                                                                                                                                                                                                                                                                                       |
| 42 | Consent or assent        | 26a | 12  | Who will obtain informed consent or assent from potential trial participants or authorised surrogates, and how (see Item 32)                                                                                                                                                                                                          |
| 43 |                          |     |     |                                                                                                                                                                                                                                                                                                                                       |
| 44 |                          |     |     |                                                                                                                                                                                                                                                                                                                                       |
| 45 |                          |     |     |                                                                                                                                                                                                                                                                                                                                       |
| 46 |                          | 26b | N/A | Additional consent provisions for collection and use of participant data and biological specimens in ancillary studies, if applicable                                                                                                                                                                                                 |
| 47 |                          |     |     |                                                                                                                                                                                                                                                                                                                                       |
| 48 |                          |     |     |                                                                                                                                                                                                                                                                                                                                       |
| 49 |                          |     |     |                                                                                                                                                                                                                                                                                                                                       |
| 50 |                          |     |     |                                                                                                                                                                                                                                                                                                                                       |
| 51 | Confidentiality          | 27  | 12  | How personal information about potential and enrolled participants will be collected, shared, and maintained in order to protect confidentiality before, during, and after the trial                                                                                                                                                  |
| 52 |                          |     |     |                                                                                                                                                                                                                                                                                                                                       |
| 53 |                          |     |     |                                                                                                                                                                                                                                                                                                                                       |
| 54 |                          |     |     |                                                                                                                                                                                                                                                                                                                                       |
| 55 |                          |     |     |                                                                                                                                                                                                                                                                                                                                       |
| 56 | Declaration of interests | 28  | 14  | Financial and other competing interests for principal investigators for the overall trial and each study site                                                                                                                                                                                                                         |
| 57 |                          |     |     |                                                                                                                                                                                                                                                                                                                                       |
| 58 |                          |     |     |                                                                                                                                                                                                                                                                                                                                       |
| 59 |                          |     |     |                                                                                                                                                                                                                                                                                                                                       |
| 60 |                          |     |     |                                                                                                                                                                                                                                                                                                                                       |

|    |                   |     |            |                                                       |
|----|-------------------|-----|------------|-------------------------------------------------------|
| 1  |                   |     |            |                                                       |
| 2  | Access to data    | 29  | 12         | Statement of who will have access to the final        |
| 3  |                   |     |            | trial dataset, and disclosure of contractual          |
| 4  |                   |     |            | agreements that limit such access for                 |
| 5  |                   |     |            | investigators                                         |
| 6  |                   |     |            |                                                       |
| 7  | Ancillary and     | 30  | N/A        | Provisions, if any, for ancillary and post-trial      |
| 8  | post-trial care   |     |            | care, and for compensation to those who suffer        |
| 9  |                   |     |            | harm from trial participation                         |
| 10 |                   |     |            |                                                       |
| 11 | Dissemination     | 31a | 12         | Plans for investigators and sponsor to                |
| 12 | policy            |     |            | communicate trial results to participants,            |
| 13 |                   |     |            | healthcare professionals, the public, and other       |
| 14 |                   |     |            | relevant groups (eg, via publication, reporting in    |
| 15 |                   |     |            | results databases, or other data sharing              |
| 16 |                   |     |            | arrangements), including any publication              |
| 17 |                   |     |            | restrictions                                          |
| 18 |                   |     |            |                                                       |
| 19 |                   |     |            |                                                       |
| 20 |                   |     |            |                                                       |
| 21 |                   | 31b | 12         | Authorship eligibility guidelines and any intended    |
| 22 |                   |     |            | use of professional writers                           |
| 23 |                   |     |            |                                                       |
| 24 |                   | 31c | 12         | Plans, if any, for granting public access to the full |
| 25 |                   |     |            | protocol, participant-level dataset, and statistical  |
| 26 |                   |     |            | code                                                  |
| 27 |                   |     |            |                                                       |
| 28 |                   |     |            |                                                       |
| 29 | <b>Appendices</b> |     |            |                                                       |
| 30 |                   |     |            |                                                       |
| 31 | Informed          | 32  | Appendix I | Model consent form and other related                  |
| 32 | consent           |     |            | documentation given to participants and               |
| 33 | materials         |     |            | authorised surrogates                                 |
| 34 |                   |     |            |                                                       |
| 35 | Biological        | 33  | N/A        | Plans for collection, laboratory evaluation, and      |
| 36 | specimens         |     |            | storage of biological specimens for genetic or        |
| 37 |                   |     |            | molecular analysis in the current trial and for       |
| 38 |                   |     |            | future use in ancillary studies, if applicable        |
| 39 |                   |     |            |                                                       |
| 40 |                   |     |            |                                                       |

\*It is strongly recommended that this checklist be read in conjunction with the SPIRIT 2013 Explanation & Elaboration for important clarification on the items. Amendments to the protocol should be tracked and dated. The SPIRIT checklist is copyrighted by the SPIRIT Group under the Creative Commons "[Attribution-NonCommercial-NoDerivs 3.0 Unported](https://creativecommons.org/licenses/by-nc-nd/3.0/)" license.
